# Supplementary material for: Robust swarm optimisation for fuzzy open shop scheduling
Source: Springer Nature journal article supplement (doi:10.1007/s11047-014-9413-1), 2014-01-31
Supplement: 11047_2014_9413_MOESM1_ESM.pdf [file 11047_2014_9413_MOESM1_ESM.pdf]

| 4x4 Problems   |                |                 |                 |               |               |               |              |              |              |              |              |             |               |             |              |       |
|----------------|----------------|-----------------|-----------------|---------------|---------------|---------------|--------------|--------------|--------------|--------------|--------------|-------------|---------------|-------------|--------------|-------|
| Problem        | Fuzzy instance | Lower Bound     |                 |               | E[Makespan]   |               |              |              | %RE          |              |              |             | Runtime (sec) |             |              |       |
|                |                | LB <sub>f</sub> | LB <sub>c</sub> | LB            | Best          | Average       | Worst        | StDev        | Best         | Average      | Worst        | StDev       | Best          | Average     | Worst        | StDev |
| j4-per10-1     | Inst. 01       | 1002.00         | 1019            | 1019.00       | 1021.0        | 1022.1        | 1044.0       | 4.441        | 0.20%        | 0.30%        | 2.45%        | 0.44%       | 0.08          | 0.10        | 0.11         | 0.007 |
|                | Inst. 02       | 1002.00         | 1019            | 1019.00       | 1028.0        | 1028.3        | 1035.5       | 1.369        | 0.88%        | 0.91%        | 1.62%        | 0.13%       | 0.08          | 0.10        | 0.11         | 0.006 |
|                | Inst. 03       | 1001.50         | 1019            | 1019.00       | 1024.3        | 1024.6        | 1030.0       | 1.459        | 0.52%        | 0.55%        | 1.08%        | 0.14%       | 0.08          | 0.10        | 0.11         | 0.007 |
|                | Inst. 04       | 1009.75         | 1019            | 1019.00       | 1025.3        | 1025.3        | 1025.3       | 0.000        | 0.61%        | 0.61%        | 0.61%        | 0.00%       | 0.08          | 0.10        | 0.11         | 0.006 |
|                | Inst. 05       | 1004.75         | 1019            | 1019.00       | 1023.8        | 1024.8        | 1031.3       | 2.593        | 0.47%        | 0.56%        | 1.20%        | 0.25%       | 0.09          | 0.10        | 0.10         | 0.005 |
|                | Inst. 06       | 1019.50         | 1019            | 1019.50       | 1034.8        | 1034.8        | 1034.8       | 0.000        | 1.50%        | 1.50%        | 1.50%        | 0.00%       | 0.09          | 0.10        | 0.10         | 0.005 |
|                | Inst. 07       | 1006.50         | 1019            | 1019.00       | 1025.8        | 1025.8        | 1025.8       | 0.000        | 0.66%        | 0.66%        | 0.66%        | 0.00%       | 0.09          | 0.10        | 0.11         | 0.006 |
|                | Inst. 08       | 1002.75         | 1019            | 1019.00       | 1028.3        | 1029.3        | 1036.0       | 2.680        | 0.91%        | 1.01%        | 1.67%        | 0.26%       | 0.08          | 0.10        | 0.10         | 0.006 |
|                | Inst. 09       | 1006.00         | 1019            | 1019.00       | 1027.8        | 1028.1        | 1037.8       | 1.826        | 0.86%        | 0.89%        | 1.84%        | 0.18%       | 0.08          | 0.09        | 0.11         | 0.007 |
|                | Inst. 10       | 1008.00         | 1019            | 1019.00       | 1033.3        | 1033.5        | 1040.5       | 1.324        | 1.40%        | 1.42%        | 2.11%        | 0.13%       | 0.09          | 0.10        | 0.11         | 0.006 |
|                | Crisp          | 1000            | 1019            | 1019.00       | 1019.0        | 1020.8        | 1044.0       | 5.331        | 0.00%        | 0.18%        | 2.45%        | 0.52%       | 0.08          | 0.09        | 0.11         | 0.007 |
| <b>Average</b> |                |                 |                 | <b>1027.2</b> | <b>1027.6</b> | <b>1034.1</b> | <b>1.569</b> | <b>0.80%</b> | <b>0.84%</b> | <b>1.47%</b> | <b>0.15%</b> | <b>0.08</b> | <b>0.10</b>   | <b>0.11</b> | <b>0.006</b> |       |
| j4-per10-2     | Inst. 01       | 1002.25         | 1000            | 1002.25       | 1002.3        | 1005.4        | 1049.3       | 11.924       | 0.00%        | 0.31%        | 4.69%        | 1.19%       | 0.09          | 0.10        | 0.10         | 0.005 |
|                | Inst. 02       | 1000.00         | 1000            | 1000.00       | 1000.0        | 1002.5        | 1048.0       | 9.822        | 0.00%        | 0.25%        | 4.80%        | 0.98%       | 0.09          | 0.09        | 0.11         | 0.006 |
|                | Inst. 03       | 1000.00         | 1000            | 1000.00       | 1000.0        | 1001.7        | 1026.0       | 6.596        | 0.00%        | 0.17%        | 2.60%        | 0.66%       | 0.09          | 0.10        | 0.11         | 0.006 |
|                | Inst. 04       | 1009.50         | 1000            | 1009.50       | 1010.0        | 1013.6        | 1050.0       | 11.155       | 0.05%        | 0.41%        | 4.01%        | 1.11%       | 0.09          | 0.10        | 0.12         | 0.007 |
|                | Inst. 05       | 1004.25         | 1000            | 1004.25       | 1007.3        | 1009.2        | 1036.8       | 7.484        | 0.30%        | 0.49%        | 3.24%        | 0.75%       | 0.08          | 0.09        | 0.11         | 0.006 |
|                | Inst. 06       | 1018.50         | 1000            | 1018.50       | 1019.3        | 1019.3        | 1019.3       | 0.000        | 0.07%        | 0.07%        | 0.07%        | 0.00%       | 0.08          | 0.09        | 0.10         | 0.006 |
|                | Inst. 07       | 1000.75         | 1000            | 1000.75       | 1005.8        | 1005.8        | 1005.8       | 0.000        | 0.50%        | 0.50%        | 0.50%        | 0.00%       | 0.09          | 0.10        | 0.10         | 0.005 |
|                | Inst. 08       | 1000.00         | 1000            | 1000.00       | 1000.5        | 1003.4        | 1062.0       | 12.006       | 0.05%        | 0.34%        | 6.20%        | 1.20%       | 0.08          | 0.09        | 0.11         | 0.006 |
|                | Inst. 09       | 1000.00         | 1000            | 1000.00       | 1003.3        | 1003.3        | 1003.3       | 0.000        | 0.33%        | 0.33%        | 0.33%        | 0.00%       | 0.08          | 0.09        | 0.11         | 0.008 |
|                | Inst. 10       | 1010.00         | 1000            | 1010.00       | 1010.0        | 1012.9        | 1049.0       | 9.176        | 0.00%        | 0.29%        | 3.86%        | 0.91%       | 0.09          | 0.10        | 0.11         | 0.006 |
|                | Crisp          | 1000            | 1000            | 1000.00       | 1000.0        | 1004.2        | 1049.0       | 11.584       | 0.00%        | 0.42%        | 4.90%        | 1.16%       | 0.09          | 0.09        | 0.11         | 0.006 |
| <b>Average</b> |                |                 |                 | <b>1005.8</b> | <b>1007.7</b> | <b>1034.9</b> | <b>6.816</b> | <b>0.13%</b> | <b>0.32%</b> | <b>3.03%</b> | <b>0.68%</b> | <b>0.09</b> | <b>0.09</b>   | <b>0.11</b> | <b>0.006</b> |       |
| j4-per20-0     | Inst. 01       | 1000.00         | 1000            | 1000.00       | 1006.3        | 1007.5        | 1019.8       | 3.571        | 0.63%        | 0.75%        | 1.98%        | 0.36%       | 0.09          | 0.10        | 0.11         | 0.006 |
|                | Inst. 02       | 1000.00         | 1000            | 1000.00       | 1001.0        | 1001.0        | 1001.0       | 0.000        | 0.10%        | 0.10%        | 0.10%        | 0.00%       | 0.08          | 0.10        | 0.11         | 0.006 |
|                | Inst. 03       | 1000.00         | 1000            | 1000.00       | 1004.8        | 1004.9        | 1007.8       | 0.552        | 0.48%        | 0.49%        | 0.78%        | 0.06%       | 0.09          | 0.10        | 0.11         | 0.006 |
|                | Inst. 04       | 1002.50         | 1000            | 1002.50       | 1003.5        | 1003.6        | 1006.0       | 0.456        | 0.10%        | 0.11%        | 0.35%        | 0.05%       | 0.09          | 0.10        | 0.11         | 0.006 |
|                | Inst. 05       | 1006.00         | 1000            | 1006.00       | 1014.8        | 1015.7        | 1025.0       | 2.679        | 0.87%        | 0.97%        | 1.89%        | 0.27%       | 0.09          | 0.10        | 0.11         | 0.006 |
|                | Inst. 06       | 1000.25         | 1000            | 1000.25       | 1010.5        | 1011.6        | 1024.5       | 2.862        | 1.02%        | 1.14%        | 2.42%        | 0.29%       | 0.09          | 0.10        | 0.11         | 0.007 |
|                | Inst. 07       | 1004.75         | 1000            | 1004.75       | 1007.8        | 1008.5        | 1028.8       | 3.839        | 0.30%        | 0.38%        | 2.39%        | 0.38%       | 0.08          | 0.10        | 0.11         | 0.007 |
|                | Inst. 08       | 1000.00         | 1000            | 1000.00       | 1007.8        | 1007.9        | 1011.8       | 0.730        | 0.78%        | 0.79%        | 1.18%        | 0.07%       | 0.09          | 0.10        | 0.10         | 0.005 |
|                | Inst. 09       | 1000.00         | 1000            | 1000.00       | 1000.0        | 1000.0        | 1000.0       | 0.000        | 0.00%        | 0.00%        | 0.00%        | 0.00%       | 0.09          | 0.10        | 0.11         | 0.007 |
|                | Inst. 10       | 1000.00         | 1000            | 1000.00       | 1003.8        | 1003.8        | 1003.8       | 0.000        | 0.38%        | 0.38%        | 0.38%        | 0.00%       | 0.09          | 0.10        | 0.11         | 0.006 |
|                | Crisp          | 1000            | 1000            | 1000.00       | 1000.0        | 1000.3        | 1004.0       | 1.015        | 0.00%        | 0.03%        | 0.40%        | 0.10%       | 0.09          | 0.10        | 0.11         | 0.006 |
| <b>Average</b> |                |                 |                 | <b>1006.0</b> | <b>1006.4</b> | <b>1012.8</b> | <b>1.469</b> | <b>0.46%</b> | <b>0.51%</b> | <b>1.15%</b> | <b>0.15%</b> | <b>0.09</b> | <b>0.10</b>   | <b>0.11</b> | <b>0.006</b> |       |
| j4-per20-1     | Inst. 01       | 1001.50         | 1004            | 1004.00       | 1014.8        | 1014.8        | 1014.8       | 0.000        | 1.07%        | 1.07%        | 1.07%        | 0.00%       | 0.08          | 0.10        | 0.10         | 0.006 |
|                | Inst. 02       | 1003.75         | 1004            | 1004.00       | 1005.8        | 1006.7        | 1013.0       | 2.507        | 0.17%        | 0.27%        | 0.90%        | 0.25%       | 0.08          | 0.10        | 0.11         | 0.006 |
|                | Inst. 03       | 1002.50         | 1004            | 1004.00       | 1006.0        | 1008.5        | 1019.3       | 4.951        | 0.20%        | 0.45%        | 1.52%        | 0.49%       | 0.08          | 0.10        | 0.13         | 0.012 |
|                | Inst. 04       | 1007.75         | 1004            | 1007.75       | 1009.8        | 1011.4        | 1016.5       | 2.869        | 0.20%        | 0.37%        | 0.87%        | 0.28%       | 0.09          | 0.10        | 0.11         | 0.007 |
|                | Inst. 05       | 1003.00         | 1004            | 1004.00       | 1006.3        | 1006.9        | 1014.5       | 2.118        | 0.22%        | 0.29%        | 1.05%        | 0.21%       | 0.09          | 0.10        | 0.11         | 0.007 |
|                | Inst. 06       | 1003.25         | 1004            | 1004.00       | 1013.5        | 1015.4        | 1024.8       | 4.264        | 0.95%        | 1.13%        | 2.07%        | 0.42%       | 0.09          | 0.10        | 0.11         | 0.006 |
|                | Inst. 07       | 1011.25         | 1004            | 1011.25       | 1016.0        | 1016.7        | 1019.0       | 1.291        | 0.47%        | 0.54%        | 0.77%        | 0.13%       | 0.09          | 0.10        | 0.11         | 0.006 |
|                | Inst. 08       | 1007.00         | 1004            | 1007.00       | 1011.3        | 1011.7        | 1013.8       | 0.948        | 0.42%        | 0.46%        | 0.67%        | 0.09%       | 0.08          | 0.10        | 0.11         | 0.006 |
|                | Inst. 09       | 1008.75         | 1004            | 1008.75       | 1015.8        | 1016.1        | 1019.0       | 0.862        | 0.69%        | 0.72%        | 1.02%        | 0.09%       | 0.09          | 0.10        | 0.11         | 0.006 |
|                | Inst. 10       | 1009.00         | 1004            | 1009.00       | 1016.3        | 1016.5        | 1017.5       | 0.510        | 0.72%        | 0.75%        | 0.84%        | 0.05%       | 0.08          | 0.10        | 0.11         | 0.007 |
|                | Crisp          | 1000            | 1004            | 1004.00       | 1004.0        | 1005.2        | 1013.0       | 3.112        | 0.00%        | 0.12%        | 0.90%        | 0.31%       | 0.08          | 0.10        | 0.11         | 0.008 |
| <b>Average</b> |                |                 |                 | <b>1011.5</b> | <b>1012.5</b> | <b>1017.2</b> | <b>2.032</b> | <b>0.51%</b> | <b>0.61%</b> | <b>1.08%</b> | <b>0.20%</b> | <b>0.09</b> | <b>0.10</b>   | <b>0.11</b> | <b>0.007</b> |       |

| 4x4 Problems   |                |                 |                 |         |               |               |               |              |              |              |              |              |               |             |             |              |
|----------------|----------------|-----------------|-----------------|---------|---------------|---------------|---------------|--------------|--------------|--------------|--------------|--------------|---------------|-------------|-------------|--------------|
| Problem        | Fuzzy instance | Lower Bound     |                 |         | E[Makespan]   |               |               |              | %RE          |              |              |              | Runtime (sec) |             |             |              |
|                |                | LB <sub>f</sub> | LB <sub>c</sub> | LB      | Best          | Average       | Worst         | StDev        | Best         | Average      | Worst        | StDev        | Best          | Average     | Worst       | StDev        |
| j4-per20-2     | Inst. 01       | 1002.75         | 1009            | 1009.00 | 1014.0        | 1014.0        | 1014.0        | 0.000        | 0.50%        | 0.50%        | 0.50%        | 0.00%        | 0.08          | 0.10        | 0.11        | 0.007        |
|                | Inst. 02       | 1008.50         | 1009            | 1009.00 | 1022.3        | 1022.4        | 1023.3        | 0.305        | 1.31%        | 1.32%        | 1.41%        | 0.03%        | 0.08          | 0.09        | 0.11        | 0.007        |
|                | Inst. 03       | 1003.25         | 1009            | 1009.00 | 1017.0        | 1017.0        | 1017.0        | 0.000        | 0.79%        | 0.79%        | 0.79%        | 0.00%        | 0.09          | 0.10        | 0.10        | 0.005        |
|                | Inst. 04       | 1008.25         | 1009            | 1009.00 | 1013.8        | 1014.2        | 1016.3        | 0.948        | 0.47%        | 0.51%        | 0.72%        | 0.09%        | 0.09          | 0.10        | 0.11        | 0.006        |
|                | Inst. 05       | 1004.25         | 1009            | 1009.00 | 1018.8        | 1018.8        | 1018.8        | 0.000        | 0.97%        | 0.97%        | 0.97%        | 0.00%        | 0.09          | 0.10        | 0.11        | 0.006        |
|                | Inst. 06       | 1004.00         | 1009            | 1009.00 | 1019.5        | 1019.5        | 1019.5        | 0.000        | 1.04%        | 1.04%        | 1.04%        | 0.00%        | 0.09          | 0.10        | 0.10        | 0.005        |
|                | Inst. 07       | 1001.25         | 1009            | 1009.00 | 1018.5        | 1018.5        | 1018.5        | 0.000        | 0.94%        | 0.94%        | 0.94%        | 0.00%        | 0.08          | 0.10        | 0.11        | 0.007        |
|                | Inst. 08       | 1001.25         | 1009            | 1009.00 | 1014.3        | 1014.3        | 1014.3        | 0.000        | 0.52%        | 0.52%        | 0.52%        | 0.00%        | 0.09          | 0.10        | 0.11        | 0.007        |
|                | Inst. 09       | 1011.50         | 1009            | 1011.50 | 1017.8        | 1017.8        | 1017.8        | 0.000        | 0.62%        | 0.62%        | 0.62%        | 0.00%        | 0.09          | 0.10        | 0.10        | 0.005        |
|                | Inst. 10       | 1017.75         | 1009            | 1017.75 | 1024.5        | 1024.5        | 1024.5        | 0.000        | 0.66%        | 0.66%        | 0.66%        | 0.00%        | 0.08          | 0.10        | 0.10        | 0.006        |
|                | Crisp          | 1000            | 1009            | 1009.00 | 1009.0        | 1009.0        | 1009.0        | 0.000        | 0.00%        | 0.00%        | 0.00%        | 0.00%        | 0.09          | 0.10        | 0.11        | 0.007        |
| <b>Average</b> |                |                 |                 |         | <b>1018.0</b> | <b>1018.1</b> | <b>1018.4</b> | <b>0.125</b> | <b>0.78%</b> | <b>0.79%</b> | <b>0.82%</b> | <b>0.01%</b> | <b>0.09</b>   | <b>0.10</b> | <b>0.11</b> | <b>0.006</b> |





| 5x5 Problems |                |                 |                 |         |               |               |               |              |              |              |              |              |               |             |             |              |
|--------------|----------------|-----------------|-----------------|---------|---------------|---------------|---------------|--------------|--------------|--------------|--------------|--------------|---------------|-------------|-------------|--------------|
| Problem      | Fuzzy instance | Lower Bound     |                 |         | E[Makespan]   |               |               |              | %RE          |              |              |              | Runtime (sec) |             |             |              |
|              |                | LB <sub>f</sub> | LB <sub>c</sub> | LB      | Best          | Average       | Worst         | StDev        | Best         | Average      | Worst        | StDev        | Best          | Average     | Worst       | StDev        |
| j5-per20-2   | Inst. 01       | 1002.00         | 1012            | 1012.00 | 1016.0        | 1016.0        | 1016.0        | 0.000        | 0.40%        | 0.40%        | 0.40%        | 0.00%        | 1.28          | 1.30        | 1.38        | 0.017        |
|              | Inst. 02       | 1000.00         | 1012            | 1012.00 | 1024.0        | 1024.0        | 1024.0        | 0.000        | 1.19%        | 1.19%        | 1.19%        | 0.00%        | 1.28          | 1.29        | 1.30        | 0.006        |
|              | Inst. 03       | 1003.50         | 1012            | 1012.00 | 1031.0        | 1031.0        | 1031.0        | 0.000        | 1.88%        | 1.88%        | 1.88%        | 0.00%        | 1.28          | 1.30        | 1.31        | 0.007        |
|              | Inst. 04       | 1009.25         | 1012            | 1012.00 | 1024.0        | 1024.0        | 1024.0        | 0.000        | 1.19%        | 1.19%        | 1.19%        | 0.00%        | 1.28          | 1.29        | 1.30        | 0.007        |
|              | Inst. 05       | 1001.00         | 1012            | 1012.00 | 1018.5        | 1018.5        | 1018.5        | 0.000        | 0.64%        | 0.64%        | 0.64%        | 0.00%        | 1.27          | 1.29        | 1.30        | 0.007        |
|              | Inst. 06       | 1016.50         | 1012            | 1016.50 | 1028.3        | 1028.3        | 1028.3        | 0.000        | 1.16%        | 1.16%        | 1.16%        | 0.00%        | 1.28          | 1.29        | 1.30        | 0.007        |
|              | Inst. 07       | 1006.00         | 1012            | 1012.00 | 1024.3        | 1024.3        | 1024.3        | 0.000        | 1.21%        | 1.21%        | 1.21%        | 0.00%        | 1.28          | 1.29        | 1.31        | 0.007        |
|              | Inst. 08       | 1000.00         | 1012            | 1012.00 | 1022.0        | 1022.0        | 1022.0        | 0.000        | 0.99%        | 0.99%        | 0.99%        | 0.00%        | 1.27          | 1.29        | 1.30        | 0.007        |
|              | Inst. 09       | 1000.25         | 1012            | 1012.00 | 1020.3        | 1020.3        | 1020.3        | 0.000        | 0.82%        | 0.82%        | 0.82%        | 0.00%        | 1.28          | 1.30        | 1.31        | 0.007        |
|              | Inst. 10       | 1006.75         | 1012            | 1012.00 | 1020.0        | 1020.0        | 1020.0        | 0.000        | 0.79%        | 0.79%        | 0.79%        | 0.00%        | 1.28          | 1.29        | 1.30        | 0.005        |
|              | Crisp          | 1000            | 1012            | 1012.00 | 1012.0        | 1012.0        | 1012.0        | 0.000        | 0.00%        | 0.00%        | 0.00%        | 0.00%        | 1.28          | 1.30        | 1.31        | 0.008        |
|              | <b>Average</b> |                 |                 |         | <b>1022.8</b> | <b>1022.8</b> | <b>1022.8</b> | <b>0.000</b> | <b>1.02%</b> | <b>1.02%</b> | <b>1.02%</b> | <b>0.00%</b> | <b>1.28</b>   | <b>1.29</b> | <b>1.31</b> | <b>0.008</b> |



| 6x6 Problems   |                |                 |                 |               |               |               |              |              |              |              |              |             |               |             |              |       |
|----------------|----------------|-----------------|-----------------|---------------|---------------|---------------|--------------|--------------|--------------|--------------|--------------|-------------|---------------|-------------|--------------|-------|
| Problem        | Fuzzy instance | Lower Bound     |                 |               | E[Makespan]   |               |              |              | %RE          |              |              |             | Runtime (sec) |             |              |       |
|                |                | LB <sub>f</sub> | LB <sub>c</sub> | LB            | Best          | Average       | Worst        | StDev        | Best         | Average      | Worst        | StDev       | Best          | Average     | Worst        | StDev |
| j6-per0-0      | Inst. 01       | 1017.75         | 1056            | 1056.00       | 1066.3        | 1068.7        | 1076.0       | 2.793        | 0.97%        | 1.20%        | 1.89%        | 0.26%       | 4.39          | 4.40        | 4.41         | 0.008 |
|                | Inst. 02       | 1023.75         | 1056            | 1056.00       | 1066.5        | 1068.1        | 1072.3       | 1.619        | 0.99%        | 1.14%        | 1.54%        | 0.15%       | 4.38          | 4.40        | 4.42         | 0.010 |
|                | Inst. 03       | 1013.75         | 1056            | 1056.00       | 1061.3        | 1065.1        | 1069.5       | 2.950        | 0.50%        | 0.86%        | 1.28%        | 0.28%       | 4.39          | 4.41        | 4.42         | 0.009 |
|                | Inst. 04       | 1011.00         | 1056            | 1056.00       | 1063.8        | 1065.4        | 1066.8       | 1.104        | 0.73%        | 0.89%        | 1.02%        | 0.10%       | 4.40          | 4.41        | 4.43         | 0.009 |
|                | Inst. 05       | 1012.50         | 1056            | 1056.00       | 1061.5        | 1063.0        | 1067.3       | 1.602        | 0.52%        | 0.66%        | 1.07%        | 0.15%       | 4.37          | 4.40        | 4.45         | 0.015 |
|                | Inst. 06       | 1020.00         | 1056            | 1056.00       | 1062.5        | 1067.8        | 1074.0       | 4.487        | 0.62%        | 1.12%        | 1.70%        | 0.42%       | 4.39          | 4.40        | 4.41         | 0.008 |
|                | Inst. 07       | 1014.75         | 1056            | 1056.00       | 1061.5        | 1065.1        | 1074.3       | 3.649        | 0.52%        | 0.86%        | 1.73%        | 0.35%       | 4.38          | 4.40        | 4.44         | 0.010 |
|                | Inst. 08       | 1013.75         | 1056            | 1056.00       | 1061.3        | 1065.3        | 1071.0       | 3.370        | 0.50%        | 0.88%        | 1.42%        | 0.32%       | 4.39          | 4.41        | 4.42         | 0.009 |
|                | Inst. 09       | 1011.50         | 1056            | 1056.00       | 1060.3        | 1065.8        | 1073.0       | 4.429        | 0.40%        | 0.93%        | 1.61%        | 0.42%       | 4.38          | 4.40        | 4.41         | 0.009 |
|                | Inst. 10       | 1023.25         | 1056            | 1056.00       | 1064.5        | 1069.0        | 1073.0       | 2.435        | 0.80%        | 1.23%        | 1.61%        | 0.23%       | 4.40          | 4.41        | 4.43         | 0.007 |
|                | Crisp          | 1000            | 1056            | 1056.00       | 1056.0        | 1058.7        | 1062.0       | 2.309        | 0.00%        | 0.25%        | 0.57%        | 0.22%       | 4.39          | 4.40        | 4.46         | 0.013 |
| <b>Average</b> |                |                 |                 | <b>1062.9</b> | <b>1066.3</b> | <b>1071.7</b> | <b>2.844</b> | <b>0.66%</b> | <b>0.98%</b> | <b>1.49%</b> | <b>0.27%</b> | <b>4.39</b> | <b>4.41</b>   | <b>4.42</b> | <b>0.009</b> |       |
| j6-per0-1      | Inst. 01       | 1022.25         | 1045            | 1045.00       | 1055.3        | 1064.9        | 1066.0       | 3.280        | 0.98%        | 1.91%        | 2.01%        | 0.31%       | 4.41          | 4.42        | 4.44         | 0.008 |
|                | Inst. 02       | 1027.00         | 1045            | 1045.00       | 1062.5        | 1070.2        | 1071.0       | 2.594        | 1.67%        | 2.41%        | 2.49%        | 0.25%       | 4.41          | 4.42        | 4.43         | 0.008 |
|                | Inst. 03       | 1029.75         | 1045            | 1045.00       | 1076.8        | 1076.8        | 1076.8       | 0.000        | 3.04%        | 3.04%        | 3.04%        | 0.00%       | 4.41          | 4.43        | 4.45         | 0.010 |
|                | Inst. 04       | 1017.00         | 1045            | 1045.00       | 1057.3        | 1064.0        | 1064.5       | 1.839        | 1.17%        | 1.82%        | 1.87%        | 0.18%       | 4.41          | 4.42        | 4.44         | 0.008 |
|                | Inst. 05       | 1020.00         | 1045            | 1045.00       | 1057.0        | 1063.3        | 1066.0       | 4.195        | 1.15%        | 1.75%        | 2.01%        | 0.40%       | 4.41          | 4.42        | 4.44         | 0.008 |
|                | Inst. 06       | 1018.75         | 1045            | 1045.00       | 1064.8        | 1070.6        | 1072.8       | 3.598        | 1.89%        | 2.45%        | 2.66%        | 0.34%       | 4.41          | 4.43        | 4.44         | 0.007 |
|                | Inst. 07       | 1017.25         | 1045            | 1045.00       | 1060.5        | 1070.0        | 1071.5       | 3.803        | 1.48%        | 2.40%        | 2.54%        | 0.36%       | 4.42          | 4.43        | 4.50         | 0.018 |
|                | Inst. 08       | 1017.50         | 1045            | 1045.00       | 1057.3        | 1061.7        | 1063.0       | 2.474        | 1.17%        | 1.59%        | 1.72%        | 0.24%       | 4.41          | 4.42        | 4.46         | 0.012 |
|                | Inst. 09       | 1011.75         | 1045            | 1045.00       | 1052.8        | 1063.5        | 1064.3       | 2.918        | 0.74%        | 1.77%        | 1.84%        | 0.28%       | 4.41          | 4.42        | 4.44         | 0.008 |
|                | Inst. 10       | 1022.50         | 1045            | 1045.00       | 1058.3        | 1065.5        | 1067.3       | 3.662        | 1.27%        | 1.96%        | 2.13%        | 0.35%       | 4.21          | 4.26        | 4.44         | 0.083 |
|                | Crisp          | 1000            | 1045            | 1045.00       | 1045.0        | 1055.3        | 1056.0       | 2.791        | 0.00%        | 0.98%        | 1.05%        | 0.27%       | 4.19          | 4.22        | 4.36         | 0.028 |
| <b>Average</b> |                |                 |                 | <b>1060.2</b> | <b>1067.0</b> | <b>1068.3</b> | <b>2.836</b> | <b>1.46%</b> | <b>2.11%</b> | <b>2.23%</b> | <b>0.27%</b> | <b>4.39</b> | <b>4.41</b>   | <b>4.45</b> | <b>0.017</b> |       |
| j6-per0-2      | Inst. 01       | 1020.00         | 1063            | 1063.00       | 1077.5        | 1077.6        | 1080.5       | 0.548        | 1.36%        | 1.37%        | 1.65%        | 0.05%       | 4.20          | 4.23        | 4.32         | 0.025 |
|                | Inst. 02       | 1019.25         | 1063            | 1063.00       | 1078.8        | 1078.8        | 1078.8       | 0.000        | 1.48%        | 1.48%        | 1.48%        | 0.00%       | 4.21          | 4.31        | 4.46         | 0.091 |
|                | Inst. 03       | 1024.75         | 1063            | 1063.00       | 1083.3        | 1083.3        | 1083.3       | 0.000        | 1.90%        | 1.90%        | 1.90%        | 0.00%       | 4.21          | 4.27        | 4.43         | 0.079 |
|                | Inst. 04       | 1009.50         | 1063            | 1063.00       | 1069.0        | 1069.0        | 1069.0       | 0.000        | 0.56%        | 0.56%        | 0.56%        | 0.00%       | 4.19          | 4.21        | 4.24         | 0.011 |
|                | Inst. 05       | 1018.50         | 1063            | 1063.00       | 1075.8        | 1075.8        | 1075.8       | 0.000        | 1.20%        | 1.20%        | 1.20%        | 0.00%       | 4.19          | 4.21        | 4.42         | 0.040 |
|                | Inst. 06       | 1017.00         | 1063            | 1063.00       | 1078.3        | 1078.3        | 1079.3       | 0.183        | 1.43%        | 1.44%        | 1.53%        | 0.02%       | 4.43          | 4.44        | 4.52         | 0.016 |
|                | Inst. 07       | 1015.25         | 1063            | 1063.00       | 1079.0        | 1079.0        | 1079.0       | 0.000        | 1.51%        | 1.51%        | 1.51%        | 0.00%       | 4.20          | 4.36        | 4.44         | 0.095 |
|                | Inst. 08       | 1019.25         | 1063            | 1063.00       | 1074.3        | 1074.3        | 1074.3       | 0.000        | 1.06%        | 1.06%        | 1.06%        | 0.00%       | 4.22          | 4.36        | 4.49         | 0.105 |
|                | Inst. 09       | 1012.75         | 1063            | 1063.00       | 1075.8        | 1075.8        | 1075.8       | 0.000        | 1.20%        | 1.20%        | 1.20%        | 0.00%       | 4.20          | 4.27        | 4.44         | 0.078 |
|                | Inst. 10       | 1024.00         | 1063            | 1063.00       | 1075.5        | 1075.5        | 1075.5       | 0.000        | 1.18%        | 1.18%        | 1.18%        | 0.00%       | 4.21          | 4.34        | 4.44         | 0.099 |
|                | Crisp          | 1000            | 1063            | 1063.00       | 1067.0        | 1067.0        | 1067.0       | 0.000        | 0.38%        | 0.38%        | 0.38%        | 0.00%       | 4.21          | 4.29        | 4.44         | 0.072 |
| <b>Average</b> |                |                 |                 | <b>1076.7</b> | <b>1076.7</b> | <b>1077.1</b> | <b>0.073</b> | <b>1.29%</b> | <b>1.29%</b> | <b>1.33%</b> | <b>0.01%</b> | <b>4.23</b> | <b>4.30</b>   | <b>4.42</b> | <b>0.064</b> |       |
| j6-per10-0     | Inst. 01       | 1005.75         | 1005            | 1005.75       | 1018.5        | 1019.7        | 1031.0       | 3.296        | 1.27%        | 1.38%        | 2.51%        | 0.33%       | 4.20          | 4.24        | 4.30         | 0.033 |
|                | Inst. 02       | 1001.50         | 1005            | 1005.00       | 1023.0        | 1025.6        | 1026.5       | 1.574        | 1.79%        | 2.05%        | 2.14%        | 0.16%       | 4.19          | 4.24        | 4.31         | 0.041 |
|                | Inst. 03       | 1005.00         | 1005            | 1005.00       | 1025.5        | 1030.5        | 1031.3       | 1.386        | 2.04%        | 2.54%        | 2.61%        | 0.14%       | 4.25          | 4.27        | 4.30         | 0.012 |
|                | Inst. 04       | 1000.00         | 1005            | 1005.00       | 1014.8        | 1014.8        | 1014.8       | 0.000        | 0.97%        | 0.97%        | 0.97%        | 0.00%       | 4.21          | 4.23        | 4.28         | 0.020 |
|                | Inst. 05       | 1000.00         | 1005            | 1005.00       | 1018.8        | 1020.4        | 1024.5       | 2.580        | 1.37%        | 1.53%        | 1.94%        | 0.26%       | 4.21          | 4.25        | 4.29         | 0.026 |
|                | Inst. 06       | 1005.50         | 1005            | 1005.50       | 1016.0        | 1017.2        | 1026.3       | 3.076        | 1.04%        | 1.16%        | 2.06%        | 0.31%       | 4.21          | 4.23        | 4.30         | 0.028 |
|                | Inst. 07       | 1002.50         | 1005            | 1005.00       | 1015.0        | 1015.0        | 1015.0       | 0.000        | 1.00%        | 1.00%        | 1.00%        | 0.00%       | 4.20          | 4.26        | 4.30         | 0.029 |
|                | Inst. 08       | 1000.00         | 1005            | 1005.00       | 1023.5        | 1024.9        | 1027.0       | 1.492        | 1.84%        | 1.98%        | 2.19%        | 0.15%       | 4.20          | 4.22        | 4.25         | 0.012 |
|                | Inst. 09       | 1000.00         | 1005            | 1005.00       | 1010.3        | 1010.7        | 1023.3       | 2.373        | 0.52%        | 0.57%        | 1.82%        | 0.24%       | 4.21          | 4.25        | 4.31         | 0.023 |
|                | Inst. 10       | 1007.00         | 1005            | 1007.00       | 1028.0        | 1030.0        | 1031.0       | 0.953        | 2.09%        | 2.28%        | 2.38%        | 0.09%       | 4.20          | 4.23        | 4.29         | 0.026 |
|                | Crisp          | 1000            | 1005            | 1005.00       | 1005.0        | 1005.0        | 1005.0       | 0.000        | 0.00%        | 0.00%        | 0.00%        | 0.00%       | 4.22          | 4.24        | 4.32         | 0.024 |
| <b>Average</b> |                |                 |                 | <b>1019.3</b> | <b>1020.9</b> | <b>1025.1</b> | <b>1.673</b> | <b>1.39%</b> | <b>1.55%</b> | <b>1.96%</b> | <b>0.17%</b> | <b>4.21</b> | <b>4.24</b>   | <b>4.29</b> | <b>0.025</b> |       |

| 6x6 Problems   |                |                 |                 |               |               |               |              |              |              |              |              |             |               |             |              |       |
|----------------|----------------|-----------------|-----------------|---------------|---------------|---------------|--------------|--------------|--------------|--------------|--------------|-------------|---------------|-------------|--------------|-------|
| Problem        | Fuzzy instance | Lower Bound     |                 |               | E[Makespan]   |               |              |              | %RE          |              |              |             | Runtime (sec) |             |              |       |
|                |                | LB <sub>f</sub> | LB <sub>c</sub> | LB            | Best          | Average       | Worst        | StDev        | Best         | Average      | Worst        | StDev       | Best          | Average     | Worst        | StDev |
| j6-per10-1     | Inst. 01       | 1013.75         | 1021            | 1021.00       | 1034.8        | 1034.8        | 1034.8       | 0.000        | 1.35%        | 1.35%        | 1.35%        | 0.00%       | 4.20          | 4.23        | 4.30         | 0.030 |
|                | Inst. 02       | 1008.00         | 1021            | 1021.00       | 1029.8        | 1029.8        | 1029.8       | 0.000        | 0.86%        | 0.86%        | 0.86%        | 0.00%       | 4.20          | 4.23        | 4.31         | 0.036 |
|                | Inst. 03       | 1018.75         | 1021            | 1021.00       | 1034.0        | 1034.0        | 1034.0       | 0.000        | 1.27%        | 1.27%        | 1.27%        | 0.00%       | 4.21          | 4.27        | 4.32         | 0.036 |
|                | Inst. 04       | 1011.50         | 1021            | 1021.00       | 1029.5        | 1029.5        | 1029.5       | 0.000        | 0.83%        | 0.83%        | 0.83%        | 0.00%       | 4.22          | 4.26        | 4.34         | 0.034 |
|                | Inst. 05       | 1005.75         | 1021            | 1021.00       | 1030.3        | 1030.3        | 1030.3       | 0.000        | 0.91%        | 0.91%        | 0.91%        | 0.00%       | 4.21          | 4.26        | 4.32         | 0.041 |
|                | Inst. 06       | 1008.75         | 1021            | 1021.00       | 1026.0        | 1026.0        | 1026.0       | 0.000        | 0.49%        | 0.49%        | 0.49%        | 0.00%       | 4.21          | 4.23        | 4.31         | 0.027 |
|                | Inst. 07       | 1007.00         | 1021            | 1021.00       | 1025.3        | 1025.7        | 1037.3       | 2.191        | 0.42%        | 0.46%        | 1.59%        | 0.21%       | 4.20          | 4.24        | 4.31         | 0.033 |
|                | Inst. 08       | 1004.00         | 1021            | 1021.00       | 1031.8        | 1032.1        | 1040.8       | 1.643        | 1.05%        | 1.08%        | 1.93%        | 0.16%       | 4.20          | 4.21        | 4.28         | 0.014 |
|                | Inst. 09       | 1006.00         | 1021            | 1021.00       | 1029.8        | 1029.8        | 1029.8       | 0.000        | 0.86%        | 0.86%        | 0.86%        | 0.00%       | 4.21          | 4.27        | 4.35         | 0.041 |
|                | Inst. 10       | 1014.25         | 1021            | 1021.00       | 1028.3        | 1028.3        | 1028.3       | 0.000        | 0.71%        | 0.71%        | 0.71%        | 0.00%       | 4.19          | 4.21        | 4.28         | 0.015 |
|                | Crisp          | 1000            | 1021            | 1021.00       | 1021.0        | 1021.0        | 1021.0       | 0.000        | 0.00%        | 0.00%        | 0.00%        | 0.00%       | 4.20          | 4.23        | 4.31         | 0.034 |
| <b>Average</b> |                |                 |                 | <b>1029.9</b> | <b>1030.0</b> | <b>1032.0</b> | <b>0.383</b> | <b>0.87%</b> | <b>0.88%</b> | <b>1.08%</b> | <b>0.04%</b> | <b>4.21</b> | <b>4.24</b>   | <b>4.31</b> | <b>0.031</b> |       |
| j6-per10-2     | Inst. 01       | 1001.25         | 1012            | 1012.00       | 1014.8        | 1014.8        | 1014.8       | 0.000        | 0.27%        | 0.27%        | 0.27%        | 0.00%       | 4.19          | 4.23        | 4.28         | 0.029 |
|                | Inst. 02       | 1006.25         | 1012            | 1012.00       | 1017.3        | 1017.3        | 1017.3       | 0.000        | 0.52%        | 0.52%        | 0.52%        | 0.00%       | 4.19          | 4.21        | 4.22         | 0.007 |
|                | Inst. 03       | 1000.00         | 1012            | 1012.00       | 1018.8        | 1018.8        | 1018.8       | 0.000        | 0.67%        | 0.67%        | 0.67%        | 0.00%       | 4.19          | 4.21        | 4.29         | 0.021 |
|                | Inst. 04       | 1003.25         | 1012            | 1012.00       | 1013.8        | 1013.8        | 1013.8       | 0.000        | 0.17%        | 0.17%        | 0.17%        | 0.00%       | 4.20          | 4.22        | 4.25         | 0.010 |
|                | Inst. 05       | 1006.00         | 1012            | 1012.00       | 1019.8        | 1019.8        | 1019.8       | 0.000        | 0.77%        | 0.77%        | 0.77%        | 0.00%       | 4.19          | 4.23        | 4.32         | 0.033 |
|                | Inst. 06       | 1000.00         | 1012            | 1012.00       | 1017.5        | 1017.5        | 1017.5       | 0.000        | 0.54%        | 0.54%        | 0.54%        | 0.00%       | 4.19          | 4.22        | 4.32         | 0.024 |
|                | Inst. 07       | 1011.00         | 1012            | 1012.00       | 1025.8        | 1025.8        | 1025.8       | 0.000        | 1.36%        | 1.36%        | 1.36%        | 0.00%       | 4.18          | 4.21        | 4.27         | 0.018 |
|                | Inst. 08       | 1000.00         | 1012            | 1012.00       | 1013.3        | 1013.3        | 1013.3       | 0.000        | 0.12%        | 0.12%        | 0.12%        | 0.00%       | 4.19          | 4.21        | 4.24         | 0.013 |
|                | Inst. 09       | 1003.25         | 1012            | 1012.00       | 1018.3        | 1018.3        | 1018.3       | 0.000        | 0.62%        | 0.62%        | 0.62%        | 0.00%       | 4.18          | 4.22        | 4.32         | 0.035 |
|                | Inst. 10       | 1009.25         | 1012            | 1012.00       | 1019.3        | 1019.3        | 1019.3       | 0.000        | 0.72%        | 0.72%        | 0.72%        | 0.00%       | 4.20          | 4.24        | 4.29         | 0.028 |
|                | Crisp          | 1000            | 1012            | 1012.00       | 1012.0        | 1012.0        | 1012.0       | 0.000        | 0.00%        | 0.00%        | 0.00%        | 0.00%       | 4.20          | 4.21        | 4.24         | 0.009 |
| <b>Average</b> |                |                 |                 | <b>1017.8</b> | <b>1017.8</b> | <b>1017.8</b> | <b>0.000</b> | <b>0.58%</b> | <b>0.58%</b> | <b>0.58%</b> | <b>0.00%</b> | <b>4.19</b> | <b>4.22</b>   | <b>4.28</b> | <b>0.022</b> |       |
| j6-per20-0     | Inst. 01       | 1000.00         | 1000            | 1000.00       | 1015.5        | 1016.0        | 1016.5       | 0.507        | 1.55%        | 1.60%        | 1.65%        | 0.05%       | 4.19          | 4.21        | 4.22         | 0.009 |
|                | Inst. 02       | 1002.25         | 1000            | 1002.25       | 1013.3        | 1017.9        | 1019.8       | 2.601        | 1.10%        | 1.56%        | 1.75%        | 0.26%       | 4.19          | 4.22        | 4.23         | 0.010 |
|                | Inst. 03       | 1000.00         | 1000            | 1000.00       | 1013.0        | 1013.2        | 1017.5       | 0.822        | 1.30%        | 1.32%        | 1.75%        | 0.08%       | 4.20          | 4.22        | 4.24         | 0.010 |
|                | Inst. 04       | 1000.00         | 1000            | 1000.00       | 1011.3        | 1011.3        | 1011.3       | 0.000        | 1.13%        | 1.13%        | 1.13%        | 0.00%       | 4.19          | 4.22        | 4.24         | 0.014 |
|                | Inst. 05       | 1008.75         | 1000            | 1008.75       | 1017.8        | 1018.8        | 1020.0       | 1.142        | 0.89%        | 1.00%        | 1.12%        | 0.11%       | 4.20          | 4.21        | 4.24         | 0.010 |
|                | Inst. 06       | 1000.00         | 1000            | 1000.00       | 1014.3        | 1014.3        | 1014.3       | 0.000        | 1.43%        | 1.43%        | 1.43%        | 0.00%       | 4.20          | 4.23        | 4.31         | 0.033 |
|                | Inst. 07       | 1012.00         | 1000            | 1012.00       | 1018.5        | 1018.5        | 1018.5       | 0.000        | 0.64%        | 0.64%        | 0.64%        | 0.00%       | 4.19          | 4.20        | 4.22         | 0.008 |
|                | Inst. 08       | 1001.75         | 1000            | 1001.75       | 1013.3        | 1013.4        | 1017.5       | 0.776        | 1.15%        | 1.16%        | 1.57%        | 0.08%       | 4.19          | 4.21        | 4.23         | 0.011 |
|                | Inst. 09       | 1002.75         | 1000            | 1002.75       | 1016.8        | 1017.8        | 1018.3       | 0.699        | 1.40%        | 1.50%        | 1.55%        | 0.07%       | 4.20          | 4.21        | 4.24         | 0.011 |
|                | Inst. 10       | 1010.25         | 1000            | 1010.25       | 1016.8        | 1016.8        | 1019.3       | 0.456        | 0.64%        | 0.65%        | 0.89%        | 0.05%       | 4.19          | 4.21        | 4.22         | 0.010 |
|                | Crisp          | 1000            | 1000            | 1000.00       | 1009.0        | 1009.4        | 1010.0       | 0.490        | 0.90%        | 0.94%        | 1.00%        | 0.05%       | 4.20          | 4.21        | 4.23         | 0.008 |
| <b>Average</b> |                |                 |                 | <b>1015.0</b> | <b>1015.8</b> | <b>1017.3</b> | <b>0.700</b> | <b>1.12%</b> | <b>1.20%</b> | <b>1.35%</b> | <b>0.07%</b> | <b>4.19</b> | <b>4.21</b>   | <b>4.24</b> | <b>0.013</b> |       |
| j6-per20-1     | Inst. 01       | 1009.75         | 1000            | 1009.75       | 1009.8        | 1009.8        | 1009.8       | 0.000        | 0.00%        | 0.00%        | 0.00%        | 0.00%       | 3.83          | 3.85        | 3.86         | 0.008 |
|                | Inst. 02       | 1004.00         | 1000            | 1004.00       | 1007.8        | 1007.8        | 1007.8       | 0.000        | 0.37%        | 0.37%        | 0.37%        | 0.00%       | 3.84          | 3.86        | 3.87         | 0.008 |
|                | Inst. 03       | 1001.75         | 1000            | 1001.75       | 1006.8        | 1006.8        | 1006.8       | 0.000        | 0.50%        | 0.50%        | 0.50%        | 0.00%       | 3.85          | 3.87        | 3.89         | 0.008 |
|                | Inst. 04       | 1005.75         | 1000            | 1005.75       | 1005.8        | 1005.8        | 1005.8       | 0.000        | 0.00%        | 0.00%        | 0.00%        | 0.00%       | 3.85          | 3.87        | 3.89         | 0.011 |
|                | Inst. 05       | 1005.00         | 1000            | 1005.00       | 1008.8        | 1008.8        | 1008.8       | 0.000        | 0.37%        | 0.37%        | 0.37%        | 0.00%       | 3.84          | 3.86        | 3.87         | 0.008 |
|                | Inst. 06       | 1007.75         | 1000            | 1007.75       | 1008.8        | 1008.8        | 1009.0       | 0.123        | 0.10%        | 0.11%        | 0.12%        | 0.01%       | 3.85          | 3.87        | 3.95         | 0.025 |
|                | Inst. 07       | 1017.50         | 1000            | 1017.50       | 1017.5        | 1017.5        | 1017.5       | 0.000        | 0.00%        | 0.00%        | 0.00%        | 0.00%       | 3.85          | 3.86        | 3.88         | 0.008 |
|                | Inst. 08       | 1001.00         | 1000            | 1001.00       | 1001.8        | 1001.8        | 1001.8       | 0.000        | 0.07%        | 0.07%        | 0.07%        | 0.00%       | 3.85          | 3.87        | 3.93         | 0.023 |
|                | Inst. 09       | 1010.00         | 1000            | 1010.00       | 1011.0        | 1011.0        | 1011.0       | 0.000        | 0.10%        | 0.10%        | 0.10%        | 0.00%       | 3.84          | 3.86        | 3.87         | 0.007 |
|                | Inst. 10       | 1015.75         | 1000            | 1015.75       | 1016.8        | 1017.6        | 1017.8       | 0.379        | 0.10%        | 0.18%        | 0.20%        | 0.04%       | 3.85          | 3.86        | 3.88         | 0.008 |
|                | Crisp          | 1000            | 1000            | 1000.00       | 1000.0        | 1000.0        | 1000.0       | 0.000        | 0.00%        | 0.00%        | 0.00%        | 0.00%       | 3.85          | 3.87        | 3.93         | 0.024 |
| <b>Average</b> |                |                 |                 | <b>1009.5</b> | <b>1009.5</b> | <b>1009.6</b> | <b>0.050</b> | <b>0.16%</b> | <b>0.17%</b> | <b>0.17%</b> | <b>0.00%</b> | <b>3.85</b> | <b>3.86</b>   | <b>3.89</b> | <b>0.011</b> |       |

| 6x6 Problems |                |                 |                 |         |               |               |               |              |              |              |              |              |               |             |             |              |
|--------------|----------------|-----------------|-----------------|---------|---------------|---------------|---------------|--------------|--------------|--------------|--------------|--------------|---------------|-------------|-------------|--------------|
| Problem      | Fuzzy instance | Lower Bound     |                 |         | E[Makespan]   |               |               |              | %RE          |              |              |              | Runtime (sec) |             |             |              |
|              |                | LB <sub>f</sub> | LB <sub>c</sub> | LB      | Best          | Average       | Worst         | StDev        | Best         | Average      | Worst        | StDev        | Best          | Average     | Worst       | StDev        |
| j6-per20-2   | Inst. 01       | 1006.75         | 1000            | 1006.75 | 1008.5        | 1008.5        | 1008.5        | 0.000        | 0.17%        | 0.17%        | 0.17%        | 0.00%        | 4.20          | 4.21        | 4.26        | 0.011        |
|              | Inst. 02       | 1004.25         | 1000            | 1004.25 | 1005.5        | 1005.5        | 1005.5        | 0.000        | 0.12%        | 0.12%        | 0.12%        | 0.00%        | 4.20          | 4.24        | 4.32        | 0.032        |
|              | Inst. 03       | 1002.00         | 1000            | 1002.00 | 1005.3        | 1006.8        | 1007.5        | 0.903        | 0.32%        | 0.47%        | 0.55%        | 0.09%        | 4.22          | 4.29        | 4.33        | 0.021        |
|              | Inst. 04       | 1006.25         | 1000            | 1006.25 | 1006.3        | 1008.6        | 1008.8        | 0.634        | 0.00%        | 0.23%        | 0.25%        | 0.06%        | 4.21          | 4.23        | 4.32        | 0.030        |
|              | Inst. 05       | 1002.00         | 1000            | 1002.00 | 1002.5        | 1007.9        | 1008.5        | 1.831        | 0.05%        | 0.59%        | 0.65%        | 0.18%        | 4.27          | 4.28        | 4.32        | 0.012        |
|              | Inst. 06       | 1000.75         | 1000            | 1000.75 | 1001.8        | 1008.6        | 1009.3        | 1.930        | 0.10%        | 0.78%        | 0.85%        | 0.19%        | 4.19          | 4.22        | 4.25        | 0.017        |
|              | Inst. 07       | 1005.25         | 1000            | 1005.25 | 1011.0        | 1011.0        | 1011.0        | 0.000        | 0.57%        | 0.57%        | 0.57%        | 0.00%        | 4.19          | 4.21        | 4.26        | 0.015        |
|              | Inst. 08       | 1008.25         | 1000            | 1008.25 | 1008.8        | 1008.8        | 1008.8        | 0.000        | 0.05%        | 0.05%        | 0.05%        | 0.00%        | 4.20          | 4.22        | 4.24        | 0.015        |
|              | Inst. 09       | 1005.75         | 1000            | 1005.75 | 1008.3        | 1010.5        | 1010.8        | 0.639        | 0.25%        | 0.48%        | 0.50%        | 0.06%        | 4.22          | 4.25        | 4.28        | 0.015        |
|              | Inst. 10       | 1003.50         | 1000            | 1003.50 | 1009.0        | 1010.9        | 1011.3        | 0.853        | 0.55%        | 0.74%        | 0.77%        | 0.08%        | 4.20          | 4.26        | 4.29        | 0.022        |
|              | Crisp          | 1000            | 1000            | 1000.00 | 1000.0        | 1000.0        | 1000.0        | 0.000        | 0.00%        | 0.00%        | 0.00%        | 0.00%        | 4.23          | 4.25        | 4.31        | 0.019        |
|              | <b>Average</b> |                 |                 |         | <b>1006.7</b> | <b>1008.7</b> | <b>1009.0</b> | <b>0.679</b> | <b>0.22%</b> | <b>0.42%</b> | <b>0.45%</b> | <b>0.07%</b> | <b>4.21</b>   | <b>4.24</b> | <b>4.29</b> | <b>0.019</b> |

| 7x7 Problems   |                |                 |                 |               |               |               |              |              |              |              |              |              |               |              |              |       |
|----------------|----------------|-----------------|-----------------|---------------|---------------|---------------|--------------|--------------|--------------|--------------|--------------|--------------|---------------|--------------|--------------|-------|
| Problem        | Fuzzy instance | Lower Bound     |                 |               | E[Makespan]   |               |              |              | %RE          |              |              |              | Runtime (sec) |              |              |       |
|                |                | LB <sub>f</sub> | LB <sub>c</sub> | LB            | Best          | Average       | Worst        | StDev        | Best         | Average      | Worst        | StDev        | Best          | Average      | Worst        | StDev |
| j7-per0-0      | Inst. 01       | 1018.00         | Unknown         | 1018.00       | 1061.0        | 1072.3        | 1076.3       | 4.426        | 4.22%        | 5.34%        | 5.72%        | 0.43%        | 10.07         | 10.11        | 10.19        | 0.025 |
|                | Inst. 02       | 1012.00         | Unknown         | 1012.00       | 1064.8        | 1070.0        | 1081.0       | 4.461        | 5.21%        | 5.73%        | 6.82%        | 0.44%        | 10.09         | 10.11        | 10.13        | 0.011 |
|                | Inst. 03       | 1014.75         | Unknown         | 1014.75       | 1061.0        | 1070.8        | 1078.3       | 4.694        | 4.56%        | 5.52%        | 6.26%        | 0.46%        | 10.08         | 10.11        | 10.16        | 0.015 |
|                | Inst. 04       | 1011.50         | Unknown         | 1011.50       | 1061.5        | 1071.3        | 1079.8       | 5.235        | 4.94%        | 5.91%        | 6.75%        | 0.52%        | 10.12         | 10.19        | 10.25        | 0.038 |
|                | Inst. 05       | 1016.50         | Unknown         | 1016.50       | 1063.0        | 1072.7        | 1078.3       | 5.166        | 4.57%        | 5.53%        | 6.07%        | 0.51%        | 10.09         | 10.14        | 10.22        | 0.032 |
|                | Inst. 06       | 1017.25         | Unknown         | 1017.25       | 1065.3        | 1071.4        | 1078.8       | 3.165        | 4.72%        | 5.32%        | 6.05%        | 0.31%        | 10.09         | 10.14        | 10.20        | 0.027 |
|                | Inst. 07       | 1014.00         | Unknown         | 1014.00       | 1065.3        | 1072.1        | 1078.5       | 3.849        | 5.05%        | 5.73%        | 6.36%        | 0.38%        | 10.10         | 10.13        | 10.15        | 0.011 |
|                | Inst. 08       | 1018.75         | Unknown         | 1018.75       | 1061.5        | 1071.6        | 1085.3       | 6.577        | 4.20%        | 5.19%        | 6.53%        | 0.65%        | 10.10         | 10.15        | 10.22        | 0.030 |
|                | Inst. 09       | 1020.00         | Unknown         | 1020.00       | 1070.3        | 1075.2        | 1082.0       | 2.495        | 4.93%        | 5.42%        | 6.08%        | 0.24%        | 10.08         | 10.15        | 10.19        | 0.032 |
|                | Inst. 10       | 1015.25         | Unknown         | 1015.25       | 1063.5        | 1069.8        | 1079.3       | 4.782        | 4.75%        | 5.37%        | 6.30%        | 0.47%        | 10.09         | 10.15        | 10.24        | 0.033 |
|                | Crisp          | 1000            | Unknown         | 1000.00       | 1051.0        | 1061.2        | 1070.0       | 7.207        | 5.10%        | 6.12%        | 7.00%        | 0.72%        | 10.13         | 10.17        | 10.22        | 0.028 |
| <b>Average</b> |                |                 |                 | <b>1063.7</b> | <b>1071.7</b> | <b>1079.7</b> | <b>4.485</b> | <b>4.72%</b> | <b>5.50%</b> | <b>6.29%</b> | <b>0.44%</b> | <b>10.09</b> | <b>10.14</b>  | <b>10.20</b> | <b>0.025</b> |       |
| j7-per0-1      | Inst. 01       | 1019.00         | 1055            | 1055.00       | 1076.0        | 1079.0        | 1085.5       | 2.124        | 1.99%        | 2.28%        | 2.89%        | 0.20%        | 10.14         | 10.16        | 10.29        | 0.029 |
|                | Inst. 02       | 1012.75         | 1055            | 1055.00       | 1070.3        | 1077.8        | 1082.3       | 3.006        | 1.45%        | 2.16%        | 2.58%        | 0.28%        | 10.14         | 10.18        | 10.22        | 0.019 |
|                | Inst. 03       | 1020.75         | 1055            | 1055.00       | 1075.0        | 1079.0        | 1086.0       | 3.515        | 1.90%        | 2.27%        | 2.94%        | 0.33%        | 10.12         | 10.16        | 10.22        | 0.028 |
|                | Inst. 04       | 1010.00         | 1055            | 1055.00       | 1068.0        | 1074.1        | 1079.3       | 3.928        | 1.23%        | 1.81%        | 2.30%        | 0.37%        | 10.13         | 10.16        | 10.28        | 0.031 |
|                | Inst. 05       | 1015.50         | 1055            | 1055.00       | 1073.5        | 1077.5        | 1081.0       | 1.300        | 1.75%        | 2.13%        | 2.46%        | 0.12%        | 10.14         | 10.17        | 10.22        | 0.016 |
|                | Inst. 06       | 1017.50         | 1055            | 1055.00       | 1072.0        | 1079.0        | 1083.3       | 3.957        | 1.61%        | 2.28%        | 2.68%        | 0.38%        | 10.15         | 10.19        | 10.25        | 0.030 |
|                | Inst. 07       | 1015.00         | 1055            | 1055.00       | 1067.5        | 1072.4        | 1079.8       | 2.481        | 1.18%        | 1.65%        | 2.35%        | 0.24%        | 10.13         | 10.17        | 10.24        | 0.029 |
|                | Inst. 08       | 1019.50         | 1055            | 1055.00       | 1077.5        | 1079.6        | 1085.5       | 1.338        | 2.13%        | 2.33%        | 2.89%        | 0.13%        | 10.13         | 10.15        | 10.23        | 0.023 |
|                | Inst. 09       | 1018.25         | 1055            | 1055.00       | 1073.0        | 1079.6        | 1086.0       | 3.705        | 1.71%        | 2.33%        | 2.94%        | 0.35%        | 10.12         | 10.14        | 10.17        | 0.013 |
|                | Inst. 10       | 1011.75         | 1055            | 1055.00       | 1073.0        | 1075.5        | 1082.0       | 2.868        | 1.71%        | 1.94%        | 2.56%        | 0.27%        | 10.13         | 10.17        | 10.21        | 0.019 |
|                | Crisp          | 1000            | 1055            | 1055.00       | 1064.0        | 1069.2        | 1077.0       | 3.782        | 0.85%        | 1.35%        | 2.09%        | 0.36%        | 10.13         | 10.17        | 10.26        | 0.027 |
| <b>Average</b> |                |                 |                 | <b>1072.6</b> | <b>1077.4</b> | <b>1083.1</b> | <b>2.822</b> | <b>1.67%</b> | <b>2.12%</b> | <b>2.66%</b> | <b>0.27%</b> | <b>10.13</b> | <b>10.17</b>  | <b>10.23</b> | <b>0.024</b> |       |
| j7-per0-2      | Inst. 01       | 1018.75         | 1056            | 1056.00       | 1073.0        | 1077.8        | 1079.8       | 2.503        | 1.61%        | 2.07%        | 2.25%        | 0.24%        | 9.83          | 10.12        | 10.20        | 0.114 |
|                | Inst. 02       | 1014.75         | 1056            | 1056.00       | 1072.0        | 1074.1        | 1079.5       | 2.205        | 1.52%        | 1.71%        | 2.23%        | 0.21%        | 9.74          | 10.14        | 10.31        | 0.087 |
|                | Inst. 03       | 1021.00         | 1056            | 1056.00       | 1074.8        | 1081.9        | 1088.0       | 3.766        | 1.78%        | 2.45%        | 3.03%        | 0.36%        | 9.65          | 10.14        | 10.35        | 0.113 |
|                | Inst. 04       | 1017.75         | 1056            | 1056.00       | 1070.5        | 1075.7        | 1084.0       | 4.266        | 1.37%        | 1.87%        | 2.65%        | 0.40%        | 9.65          | 9.93         | 10.18        | 0.217 |
|                | Inst. 05       | 1011.75         | 1056            | 1056.00       | 1066.5        | 1076.1        | 1081.8       | 4.462        | 0.99%        | 1.90%        | 2.44%        | 0.42%        | 9.65          | 9.86         | 10.19        | 0.232 |
|                | Inst. 06       | 1020.75         | 1056            | 1056.00       | 1070.8        | 1078.4        | 1086.0       | 2.697        | 1.40%        | 2.12%        | 2.84%        | 0.26%        | 9.63          | 9.65         | 9.69         | 0.017 |
|                | Inst. 07       | 1013.00         | 1056            | 1056.00       | 1068.5        | 1076.4        | 1080.0       | 2.590        | 1.18%        | 1.93%        | 2.27%        | 0.25%        | 9.67          | 9.70         | 9.79         | 0.028 |
|                | Inst. 08       | 1014.00         | 1056            | 1056.00       | 1067.0        | 1075.6        | 1078.0       | 3.153        | 1.04%        | 1.86%        | 2.08%        | 0.30%        | 9.62          | 9.65         | 9.72         | 0.019 |
|                | Inst. 09       | 1018.75         | 1056            | 1056.00       | 1067.3        | 1075.6        | 1083.0       | 5.672        | 1.07%        | 1.86%        | 2.56%        | 0.54%        | 9.65          | 9.68         | 9.79         | 0.033 |
|                | Inst. 10       | 1011.50         | 1056            | 1056.00       | 1067.0        | 1077.3        | 1083.5       | 4.722        | 1.04%        | 2.01%        | 2.60%        | 0.45%        | 9.67          | 9.70         | 9.81         | 0.033 |
|                | Crisp          | 1000            | 1056            | 1056.00       | 1059.0        | 1068.3        | 1073.0       | 4.641        | 0.28%        | 1.17%        | 1.61%        | 0.44%        | 9.64          | 9.76         | 9.89         | 0.092 |
| <b>Average</b> |                |                 |                 | <b>1069.7</b> | <b>1076.9</b> | <b>1082.4</b> | <b>3.604</b> | <b>1.30%</b> | <b>1.98%</b> | <b>2.50%</b> | <b>0.34%</b> | <b>9.68</b>  | <b>9.86</b>   | <b>10.00</b> | <b>0.089</b> |       |
| j7-per10-0     | Inst. 01       | 1021.75         | 1013            | 1021.75       | 1036.0        | 1036.3        | 1036.5       | 0.252        | 1.39%        | 1.42%        | 1.44%        | 0.02%        | 9.26          | 9.36         | 9.51         | 0.083 |
|                | Inst. 02       | 1009.50         | 1013            | 1013.00       | 1026.8        | 1028.3        | 1041.8       | 2.913        | 1.36%        | 1.51%        | 2.84%        | 0.29%        | 9.28          | 9.32         | 9.39         | 0.026 |
|                | Inst. 03       | 1000.00         | 1013            | 1013.00       | 1029.0        | 1031.8        | 1034.3       | 1.842        | 1.58%        | 1.85%        | 2.10%        | 0.18%        | 9.27          | 9.34         | 9.52         | 0.068 |
|                | Inst. 04       | 1002.75         | 1013            | 1013.00       | 1025.5        | 1027.2        | 1035.0       | 3.010        | 1.23%        | 1.41%        | 2.17%        | 0.30%        | 9.29          | 9.33         | 9.48         | 0.038 |
|                | Inst. 05       | 1002.75         | 1013            | 1013.00       | 1025.5        | 1026.0        | 1031.8       | 1.258        | 1.23%        | 1.28%        | 1.85%        | 0.12%        | 9.27          | 9.31         | 9.40         | 0.023 |
|                | Inst. 06       | 1001.00         | 1013            | 1013.00       | 1028.8        | 1031.5        | 1034.0       | 1.355        | 1.55%        | 1.83%        | 2.07%        | 0.13%        | 9.27          | 9.32         | 9.44         | 0.034 |
|                | Inst. 07       | 1004.75         | 1013            | 1013.00       | 1025.3        | 1028.2        | 1036.8       | 3.819        | 1.21%        | 1.50%        | 2.34%        | 0.38%        | 9.28          | 9.32         | 9.40         | 0.031 |
|                | Inst. 08       | 1005.50         | 1013            | 1013.00       | 1031.0        | 1032.3        | 1039.0       | 2.627        | 1.78%        | 1.91%        | 2.57%        | 0.26%        | 9.32          | 9.38         | 9.56         | 0.054 |
|                | Inst. 09       | 1018.00         | 1013            | 1018.00       | 1032.5        | 1033.5        | 1044.8       | 2.548        | 1.42%        | 1.53%        | 2.63%        | 0.25%        | 9.33          | 9.39         | 9.53         | 0.061 |
|                | Inst. 10       | 1000.25         | 1013            | 1013.00       | 1025.0        | 1026.9        | 1036.0       | 3.556        | 1.18%        | 1.37%        | 2.27%        | 0.35%        | 9.25          | 9.29         | 9.32         | 0.017 |
|                | Crisp          | 1000            | 1013            | 1013.00       | 1017.0        | 1021.8        | 1031.0       | 3.461        | 0.39%        | 0.87%        | 1.78%        | 0.34%        | 9.33          | 9.37         | 9.51         | 0.042 |
| <b>Average</b> |                |                 |                 | <b>1028.5</b> | <b>1030.2</b> | <b>1037.0</b> | <b>2.318</b> | <b>1.39%</b> | <b>1.56%</b> | <b>2.23%</b> | <b>0.23%</b> | <b>9.28</b>  | <b>9.34</b>   | <b>9.46</b>  | <b>0.044</b> |       |

| 7x7 Problems   |                |                 |                 |               |               |               |              |              |              |              |              |             |               |             |              |       |
|----------------|----------------|-----------------|-----------------|---------------|---------------|---------------|--------------|--------------|--------------|--------------|--------------|-------------|---------------|-------------|--------------|-------|
| Problem        | Fuzzy instance | Lower Bound     |                 |               | E[Makespan]   |               |              |              | %RE          |              |              |             | Runtime (sec) |             |              |       |
|                |                | LB <sub>f</sub> | LB <sub>c</sub> | LB            | Best          | Average       | Worst        | StDev        | Best         | Average      | Worst        | StDev       | Best          | Average     | Worst        | StDev |
| j7-per10-1     | Inst. 01       | 1007.25         | 1000            | 1007.25       | 1021.0        | 1021.1        | 1022.8       | 0.320        | 1.37%        | 1.37%        | 1.54%        | 0.03%       | 9.61          | 9.76        | 9.82         | 0.062 |
|                | Inst. 02       | 1000.00         | 1000            | 1000.00       | 1010.5        | 1010.7        | 1016.8       | 1.141        | 1.05%        | 1.07%        | 1.68%        | 0.11%       | 9.65          | 9.73        | 9.85         | 0.080 |
|                | Inst. 03       | 1001.00         | 1000            | 1001.00       | 1018.8        | 1019.0        | 1020.8       | 0.688        | 1.77%        | 1.80%        | 1.97%        | 0.07%       | 9.67          | 9.75        | 9.90         | 0.061 |
|                | Inst. 04       | 1001.25         | 1000            | 1001.25       | 1014.0        | 1014.0        | 1014.0       | 0.000        | 1.27%        | 1.27%        | 1.27%        | 0.00%       | 9.63          | 9.67        | 9.86         | 0.070 |
|                | Inst. 05       | 1001.50         | 1000            | 1001.50       | 1010.5        | 1010.5        | 1010.5       | 0.000        | 0.90%        | 0.90%        | 0.90%        | 0.00%       | 9.65          | 9.69        | 9.82         | 0.041 |
|                | Inst. 06       | 1001.00         | 1000            | 1001.00       | 1020.5        | 1021.7        | 1024.5       | 1.186        | 1.95%        | 2.07%        | 2.35%        | 0.12%       | 9.60          | 9.65        | 9.77         | 0.035 |
|                | Inst. 07       | 1002.00         | 1000            | 1002.00       | 1011.0        | 1012.5        | 1019.5       | 3.141        | 0.90%        | 1.05%        | 1.75%        | 0.31%       | 9.61          | 9.65        | 9.80         | 0.043 |
|                | Inst. 08       | 1007.75         | 1000            | 1007.75       | 1019.0        | 1019.2        | 1020.5       | 0.458        | 1.12%        | 1.13%        | 1.27%        | 0.05%       | 9.63          | 9.66        | 9.69         | 0.015 |
|                | Inst. 09       | 1014.00         | 1000            | 1014.00       | 1023.5        | 1023.9        | 1025.8       | 0.853        | 0.94%        | 0.97%        | 1.16%        | 0.08%       | 9.61          | 9.66        | 9.72         | 0.030 |
|                | Inst. 10       | 1002.75         | 1000            | 1002.75       | 1016.0        | 1016.7        | 1025.3       | 1.777        | 1.32%        | 1.39%        | 2.24%        | 0.18%       | 9.70          | 9.73        | 9.80         | 0.026 |
|                | Crisp          | 1000            | 1000            | 1000.00       | 1006.0        | 1007.0        | 1013.0       | 2.025        | 0.60%        | 0.70%        | 1.30%        | 0.20%       | 9.66          | 9.75        | 9.84         | 0.046 |
| <b>Average</b> |                |                 |                 | <b>1016.5</b> | <b>1016.9</b> | <b>1020.0</b> | <b>0.956</b> | <b>1.26%</b> | <b>1.30%</b> | <b>1.61%</b> | <b>0.10%</b> | <b>9.64</b> | <b>9.70</b>   | <b>9.80</b> | <b>0.046</b> |       |
| j7-per10-2     | Inst. 01       | 1009.50         | 1011            | 1011.00       | 1029.8        | 1031.8        | 1039.8       | 2.987        | 1.85%        | 2.06%        | 2.84%        | 0.30%       | 9.61          | 9.64        | 9.73         | 0.025 |
|                | Inst. 02       | 1009.75         | 1011            | 1011.00       | 1025.8        | 1029.5        | 1040.5       | 4.552        | 1.46%        | 1.83%        | 2.92%        | 0.45%       | 9.63          | 9.65        | 9.69         | 0.016 |
|                | Inst. 03       | 1014.25         | 1011            | 1014.25       | 1030.5        | 1032.3        | 1043.0       | 2.599        | 1.60%        | 1.78%        | 2.83%        | 0.26%       | 9.62          | 9.65        | 9.68         | 0.016 |
|                | Inst. 04       | 1006.00         | 1011            | 1011.00       | 1025.0        | 1031.8        | 1038.0       | 3.727        | 1.38%        | 2.06%        | 2.67%        | 0.37%       | 9.64          | 9.68        | 9.71         | 0.021 |
|                | Inst. 05       | 1003.75         | 1011            | 1011.00       | 1026.3        | 1030.7        | 1040.0       | 3.997        | 1.51%        | 1.95%        | 2.87%        | 0.40%       | 9.64          | 9.66        | 9.68         | 0.014 |
|                | Inst. 06       | 1008.50         | 1011            | 1011.00       | 1027.5        | 1030.0        | 1040.5       | 3.678        | 1.63%        | 1.88%        | 2.92%        | 0.36%       | 9.61          | 9.65        | 9.68         | 0.015 |
|                | Inst. 07       | 1013.25         | 1011            | 1013.25       | 1031.3        | 1034.6        | 1042.3       | 2.002        | 1.78%        | 2.11%        | 2.86%        | 0.20%       | 9.62          | 9.64        | 9.66         | 0.013 |
|                | Inst. 08       | 1006.50         | 1011            | 1011.00       | 1027.8        | 1030.2        | 1041.0       | 3.201        | 1.66%        | 1.90%        | 2.97%        | 0.32%       | 9.60          | 9.64        | 9.69         | 0.018 |
|                | Inst. 09       | 1012.25         | 1011            | 1012.25       | 1030.0        | 1033.2        | 1041.0       | 3.174        | 1.75%        | 2.06%        | 2.84%        | 0.31%       | 9.62          | 9.65        | 9.68         | 0.015 |
|                | Inst. 10       | 1004.25         | 1011            | 1011.00       | 1027.0        | 1029.9        | 1035.3       | 3.472        | 1.58%        | 1.87%        | 2.40%        | 0.34%       | 9.63          | 9.67        | 9.71         | 0.019 |
|                | Crisp          | 1000            | 1011            | 1011.00       | 1020.0        | 1022.8        | 1026.0       | 2.788        | 0.89%        | 1.16%        | 1.48%        | 0.28%       | 9.72          | 9.74        | 9.76         | 0.013 |
| <b>Average</b> |                |                 |                 | <b>1028.1</b> | <b>1031.4</b> | <b>1040.1</b> | <b>3.339</b> | <b>1.62%</b> | <b>1.95%</b> | <b>2.81%</b> | <b>0.33%</b> | <b>9.62</b> | <b>9.65</b>   | <b>9.69</b> | <b>0.017</b> |       |
| j7-per20-0     | Inst. 01       | 1000.75         | 1000            | 1000.75       | 1000.8        | 1000.8        | 1001.8       | 0.193        | 0.00%        | 0.01%        | 0.10%        | 0.02%       | 9.64          | 9.67        | 9.69         | 0.013 |
|                | Inst. 02       | 1000.00         | 1000            | 1000.00       | 1000.0        | 1000.0        | 1000.0       | 0.000        | 0.00%        | 0.00%        | 0.00%        | 0.00%       | 9.62          | 9.65        | 9.69         | 0.017 |
|                | Inst. 03       | 1000.00         | 1000            | 1000.00       | 1000.0        | 1000.5        | 1001.3       | 0.385        | 0.00%        | 0.05%        | 0.13%        | 0.04%       | 9.62          | 9.66        | 9.68         | 0.014 |
|                | Inst. 04       | 1000.00         | 1000            | 1000.00       | 1000.0        | 1000.3        | 1001.5       | 0.400        | 0.00%        | 0.03%        | 0.15%        | 0.04%       | 9.60          | 9.63        | 9.67         | 0.018 |
|                | Inst. 05       | 1000.00         | 1000            | 1000.00       | 1000.0        | 1000.0        | 1000.8       | 0.143        | 0.00%        | 0.00%        | 0.08%        | 0.01%       | 9.62          | 9.65        | 9.70         | 0.015 |
|                | Inst. 06       | 1000.50         | 1000            | 1000.50       | 1000.5        | 1000.8        | 1002.5       | 0.571        | 0.00%        | 0.03%        | 0.20%        | 0.06%       | 9.61          | 9.64        | 9.65         | 0.012 |
|                | Inst. 07       | 1005.50         | 1000            | 1005.50       | 1005.5        | 1005.5        | 1005.5       | 0.000        | 0.00%        | 0.00%        | 0.00%        | 0.00%       | 9.64          | 9.66        | 9.69         | 0.012 |
|                | Inst. 08       | 1000.00         | 1000            | 1000.00       | 1000.0        | 1000.0        | 1000.0       | 0.000        | 0.00%        | 0.00%        | 0.00%        | 0.00%       | 9.60          | 9.63        | 9.65         | 0.014 |
|                | Inst. 09       | 1000.00         | 1000            | 1000.00       | 1000.0        | 1000.0        | 1000.0       | 0.000        | 0.00%        | 0.00%        | 0.00%        | 0.00%       | 9.67          | 9.70        | 9.72         | 0.014 |
|                | Inst. 10       | 1000.00         | 1000            | 1000.00       | 1000.0        | 1000.0        | 1000.0       | 0.000        | 0.00%        | 0.00%        | 0.00%        | 0.00%       | 9.70          | 9.73        | 9.76         | 0.014 |
|                | Crisp          | 1000            | 1000            | 1000.00       | 1000.0        | 1000.0        | 1000.0       | 0.000        | 0.00%        | 0.00%        | 0.00%        | 0.00%       | 9.65          | 9.66        | 9.68         | 0.008 |
| <b>Average</b> |                |                 |                 | <b>1000.7</b> | <b>1000.8</b> | <b>1001.3</b> | <b>0.169</b> | <b>0.00%</b> | <b>0.01%</b> | <b>0.06%</b> | <b>0.02%</b> | <b>9.63</b> | <b>9.66</b>   | <b>9.69</b> | <b>0.014</b> |       |
| j7-per20-1     | Inst. 01       | 1012.00         | 1005            | 1012.00       | 1025.3        | 1027.6        | 1034.0       | 3.154        | 1.31%        | 1.54%        | 2.17%        | 0.31%       | 9.88          | 9.91        | 9.94         | 0.017 |
|                | Inst. 02       | 1006.50         | 1005            | 1006.50       | 1019.0        | 1025.7        | 1033.3       | 3.356        | 1.24%        | 1.90%        | 2.66%        | 0.33%       | 9.63          | 9.66        | 9.69         | 0.015 |
|                | Inst. 03       | 1013.25         | 1005            | 1013.25       | 1028.3        | 1032.3        | 1036.0       | 2.823        | 1.48%        | 1.88%        | 2.25%        | 0.28%       | 9.62          | 9.68        | 9.74         | 0.031 |
|                | Inst. 04       | 1020.75         | 1005            | 1020.75       | 1032.8        | 1035.2        | 1039.3       | 1.746        | 1.18%        | 1.42%        | 1.81%        | 0.17%       | 9.63          | 9.68        | 9.73         | 0.028 |
|                | Inst. 05       | 1009.75         | 1005            | 1009.75       | 1021.8        | 1025.0        | 1028.3       | 2.728        | 1.19%        | 1.51%        | 1.83%        | 0.27%       | 9.63          | 9.65        | 9.66         | 0.008 |
|                | Inst. 06       | 1012.25         | 1005            | 1012.25       | 1021.8        | 1025.7        | 1030.5       | 3.005        | 0.94%        | 1.33%        | 1.80%        | 0.30%       | 9.62          | 9.65        | 9.68         | 0.015 |
|                | Inst. 07       | 1004.50         | 1005            | 1005.00       | 1023.0        | 1025.8        | 1032.3       | 2.299        | 1.79%        | 2.07%        | 2.71%        | 0.23%       | 9.65          | 9.70        | 9.87         | 0.041 |
|                | Inst. 08       | 1005.75         | 1005            | 1005.75       | 1017.8        | 1026.0        | 1030.0       | 2.903        | 1.19%        | 2.01%        | 2.41%        | 0.29%       | 9.62          | 9.65        | 9.68         | 0.017 |
|                | Inst. 09       | 1020.75         | 1005            | 1020.75       | 1029.8        | 1031.4        | 1038.0       | 3.011        | 0.88%        | 1.04%        | 1.69%        | 0.30%       | 9.61          | 9.65        | 9.69         | 0.015 |
|                | Inst. 10       | 1006.00         | 1005            | 1006.00       | 1022.5        | 1028.2        | 1031.8       | 1.520        | 1.64%        | 2.20%        | 2.56%        | 0.15%       | 9.61          | 9.63        | 9.65         | 0.013 |
|                | Crisp          | 1000            | 1005            | 1005.00       | 1016.0        | 1019.7        | 1026.0       | 2.288        | 1.09%        | 1.47%        | 2.09%        | 0.23%       | 9.72          | 9.75        | 9.87         | 0.026 |
| <b>Average</b> |                |                 |                 | <b>1024.2</b> | <b>1028.3</b> | <b>1033.3</b> | <b>2.655</b> | <b>1.28%</b> | <b>1.69%</b> | <b>2.19%</b> | <b>0.26%</b> | <b>9.65</b> | <b>9.69</b>   | <b>9.73</b> | <b>0.020</b> |       |

| 7x7 Problems |                |                 |                 |         |               |               |               |              |              |              |              |              |               |             |             |              |  |
|--------------|----------------|-----------------|-----------------|---------|---------------|---------------|---------------|--------------|--------------|--------------|--------------|--------------|---------------|-------------|-------------|--------------|--|
| Problem      | Fuzzy instance | Lower Bound     |                 |         | E[Makespan]   |               |               |              | %RE          |              |              |              | Runtime (sec) |             |             |              |  |
|              |                | LB <sub>f</sub> | LB <sub>c</sub> | LB      | Best          | Average       | Worst         | StDev        | Best         | Average      | Worst        | StDev        | Best          | Average     | Worst       | StDev        |  |
| j7-per20-2   | Inst. 01       | 1008.50         | 1003            | 1008.50 | 1016.5        | 1021.5        | 1026.8        | 3.386        | 0.79%        | 1.29%        | 1.81%        | 0.34%        | 9.59          | 9.66        | 9.73        | 0.043        |  |
|              | Inst. 02       | 1003.25         | 1003            | 1003.25 | 1013.8        | 1015.9        | 1026.5        | 3.162        | 1.05%        | 1.26%        | 2.32%        | 0.32%        | 9.63          | 9.67        | 9.72        | 0.017        |  |
|              | Inst. 03       | 1007.25         | 1003            | 1007.25 | 1018.5        | 1025.6        | 1032.0        | 2.638        | 1.12%        | 1.82%        | 2.46%        | 0.26%        | 9.63          | 9.66        | 9.68        | 0.012        |  |
|              | Inst. 04       | 1002.50         | 1003            | 1003.00 | 1016.5        | 1021.6        | 1027.5        | 2.826        | 1.35%        | 1.86%        | 2.44%        | 0.28%        | 9.63          | 9.65        | 9.68        | 0.011        |  |
|              | Inst. 05       | 1002.00         | 1003            | 1003.00 | 1011.3        | 1020.1        | 1027.3        | 2.949        | 0.82%        | 1.70%        | 2.42%        | 0.29%        | 9.65          | 9.68        | 9.70        | 0.015        |  |
|              | Inst. 06       | 1001.00         | 1003            | 1003.00 | 1018.5        | 1024.1        | 1029.0        | 2.450        | 1.55%        | 2.11%        | 2.59%        | 0.24%        | 9.61          | 9.66        | 9.68        | 0.016        |  |
|              | Inst. 07       | 1008.25         | 1003            | 1008.25 | 1018.3        | 1023.9        | 1029.8        | 3.443        | 0.99%        | 1.55%        | 2.13%        | 0.34%        | 9.62          | 9.65        | 9.66        | 0.013        |  |
|              | Inst. 08       | 1003.50         | 1003            | 1003.50 | 1014.5        | 1023.0        | 1026.3        | 2.650        | 1.10%        | 1.95%        | 2.27%        | 0.26%        | 9.63          | 9.66        | 9.68        | 0.015        |  |
|              | Inst. 09       | 1007.75         | 1003            | 1007.75 | 1018.8        | 1021.5        | 1026.3        | 1.342        | 1.09%        | 1.37%        | 1.84%        | 0.13%        | 9.62          | 9.65        | 9.67        | 0.013        |  |
|              | Inst. 10       | 1007.25         | 1003            | 1007.25 | 1016.5        | 1021.0        | 1026.3        | 2.411        | 0.92%        | 1.36%        | 1.89%        | 0.24%        | 9.62          | 9.65        | 9.68        | 0.015        |  |
|              | Crisp          | 1000            | 1003            | 1003.00 | 1008.0        | 1014.0        | 1024.0        | 3.311        | 0.50%        | 1.10%        | 2.09%        | 0.33%        | 9.65          | 9.67        | 9.69        | 0.011        |  |
|              | <b>Average</b> |                 |                 |         | <b>1016.3</b> | <b>1021.8</b> | <b>1027.8</b> | <b>2.726</b> | <b>1.08%</b> | <b>1.63%</b> | <b>2.22%</b> | <b>0.27%</b> | <b>9.62</b>   | <b>9.66</b> | <b>9.69</b> | <b>0.017</b> |  |

| 8x8 Problems |                |                 |                 |         |             |         |        |       |       |         |       |       |               |         |       |       |
|--------------|----------------|-----------------|-----------------|---------|-------------|---------|--------|-------|-------|---------|-------|-------|---------------|---------|-------|-------|
| Problem      | Fuzzy instance | Lower Bound     |                 |         | E[Makespan] |         |        |       | %RE   |         |       |       | Runtime (sec) |         |       |       |
|              |                | LB <sub>f</sub> | LB <sub>c</sub> | LB      | Best        | Average | Worst  | StDev | Best  | Average | Worst | StDev | Best          | Average | Worst | StDev |
| j8-per0-1    | Inst. 01       | 1023.25         | Unknown         | 1023.25 | 1056.0      | 1072.4  | 1083.5 | 5.514 | 3.20% | 4.80%   | 5.89% | 0.54% | 19.84         | 19.93   | 20.07 | 0.052 |
|              | Inst. 02       | 1018.50         | Unknown         | 1018.50 | 1065.8      | 1074.3  | 1084.5 | 5.144 | 4.64% | 5.47%   | 6.48% | 0.51% | 19.86         | 19.92   | 20.14 | 0.049 |
|              | Inst. 03       | 1016.00         | Unknown         | 1016.00 | 1061.8      | 1072.3  | 1081.8 | 4.763 | 4.50% | 5.54%   | 6.47% | 0.47% | 19.81         | 19.89   | 20.00 | 0.043 |
|              | Inst. 04       | 1017.00         | Unknown         | 1017.00 | 1065.0      | 1073.3  | 1085.0 | 6.075 | 4.72% | 5.53%   | 6.69% | 0.60% | 19.81         | 19.96   | 20.02 | 0.060 |
|              | Inst. 05       | 1015.50         | Unknown         | 1015.50 | 1058.5      | 1070.8  | 1079.0 | 5.480 | 4.23% | 5.44%   | 6.25% | 0.54% | 19.80         | 19.88   | 19.95 | 0.028 |
|              | Inst. 06       | 1016.50         | Unknown         | 1016.50 | 1061.5      | 1071.8  | 1081.5 | 5.054 | 4.43% | 5.44%   | 6.39% | 0.50% | 19.85         | 19.96   | 20.10 | 0.071 |
|              | Inst. 07       | 1013.00         | Unknown         | 1013.00 | 1057.3      | 1070.4  | 1081.3 | 6.595 | 4.37% | 5.67%   | 6.74% | 0.65% | 19.82         | 19.90   | 20.09 | 0.069 |
|              | Inst. 08       | 1015.00         | Unknown         | 1015.00 | 1062.3      | 1070.8  | 1078.5 | 4.485 | 4.66% | 5.50%   | 6.26% | 0.44% | 19.84         | 19.89   | 19.94 | 0.024 |
|              | Inst. 09       | 1025.75         | Unknown         | 1025.75 | 1071.5      | 1077.6  | 1082.5 | 2.614 | 4.46% | 5.06%   | 5.53% | 0.25% | 19.82         | 19.89   | 19.92 | 0.019 |
|              | Inst. 10       | 1012.75         | Unknown         | 1012.75 | 1062.3      | 1070.9  | 1081.8 | 5.736 | 4.89% | 5.74%   | 6.81% | 0.57% | 19.84         | 19.88   | 19.95 | 0.025 |
|              | Crisp          | 1000            | Unknown         | 1000.00 | 1047.0      | 1062.1  | 1071.0 | 5.800 | 4.70% | 6.21%   | 7.10% | 0.58% | 18.94         | 19.84   | 19.97 | 0.257 |
| Average      |                |                 |                 | 1062.2  | 1072.5      | 1081.9  | 5.146  | 4.41% | 5.42% | 6.35%   | 0.51% | 19.83 | 19.91         | 20.02   | 0.044 |       |
| j8-per0-2    | Inst. 01       | 1021.25         | Unknown         | 1021.25 | 1075.8      | 1079.7  | 1090.0 | 4.192 | 5.34% | 5.72%   | 6.73% | 0.41% | 19.35         | 19.60   | 20.40 | 0.290 |
|              | Inst. 02       | 1019.50         | Unknown         | 1019.50 | 1068.8      | 1077.8  | 1084.3 | 4.467 | 4.83% | 5.72%   | 6.35% | 0.44% | 19.41         | 19.90   | 20.57 | 0.391 |
|              | Inst. 03       | 1016.50         | Unknown         | 1016.50 | 1069.8      | 1075.6  | 1088.3 | 5.647 | 5.24% | 5.82%   | 7.06% | 0.56% | 19.41         | 19.99   | 20.58 | 0.459 |
|              | Inst. 04       | 1014.50         | Unknown         | 1014.50 | 1068.3      | 1073.6  | 1086.8 | 6.620 | 5.30% | 5.83%   | 7.12% | 0.65% | 19.38         | 19.55   | 19.75 | 0.104 |
|              | Inst. 05       | 1014.00         | Unknown         | 1014.00 | 1066.8      | 1073.9  | 1083.8 | 5.210 | 5.20% | 5.91%   | 6.88% | 0.51% | 19.35         | 19.46   | 19.75 | 0.100 |
|              | Inst. 06       | 1016.75         | Unknown         | 1016.75 | 1074.8      | 1078.1  | 1086.3 | 4.084 | 5.70% | 6.04%   | 6.84% | 0.40% | 19.37         | 19.45   | 19.65 | 0.071 |
|              | Inst. 07       | 1013.75         | Unknown         | 1013.75 | 1073.3      | 1076.0  | 1083.8 | 2.401 | 5.87% | 6.14%   | 6.91% | 0.24% | 19.35         | 19.42   | 19.65 | 0.063 |
|              | Inst. 08       | 1014.75         | Unknown         | 1014.75 | 1075.5      | 1079.7  | 1088.8 | 4.118 | 5.99% | 6.40%   | 7.29% | 0.41% | 19.37         | 19.49   | 19.78 | 0.106 |
|              | Inst. 09       | 1020.75         | Unknown         | 1020.75 | 1073.3      | 1078.1  | 1086.8 | 4.615 | 5.14% | 5.61%   | 6.47% | 0.45% | 19.40         | 19.48   | 19.58 | 0.049 |
|              | Inst. 10       | 1020.75         | Unknown         | 1020.75 | 1076.0      | 1081.0  | 1086.5 | 2.645 | 5.41% | 5.90%   | 6.44% | 0.26% | 19.36         | 19.48   | 19.75 | 0.103 |
|              | Crisp          | 1000            | Unknown         | 1000.00 | 1062.0      | 1065.9  | 1074.0 | 3.487 | 6.20% | 6.59%   | 7.40% | 0.35% | 19.37         | 19.44   | 19.70 | 0.059 |
| Average      |                |                 |                 | 1072.2  | 1077.4      | 1086.5  | 4.400  | 5.40% | 5.91% | 6.81%   | 0.43% | 19.38 | 19.58         | 19.95   | 0.174 |       |
| j8-per10-0   | Inst. 01       | 1014.50         | Unknown         | 1014.50 | 1042.0      | 1049.8  | 1055.8 | 2.433 | 2.71% | 3.48%   | 4.07% | 0.24% | 19.47         | 19.68   | 19.87 | 0.131 |
|              | Inst. 02       | 1007.25         | Unknown         | 1007.25 | 1036.3      | 1046.3  | 1053.0 | 2.927 | 2.88% | 3.88%   | 4.54% | 0.29% | 19.40         | 19.58   | 19.80 | 0.121 |
|              | Inst. 03       | 1019.50         | Unknown         | 1019.50 | 1047.0      | 1049.7  | 1056.5 | 2.329 | 2.70% | 2.97%   | 3.63% | 0.23% | 19.36         | 19.44   | 19.65 | 0.048 |
|              | Inst. 04       | 1022.75         | Unknown         | 1022.75 | 1051.0      | 1053.1  | 1055.5 | 1.006 | 2.76% | 2.96%   | 3.20% | 0.10% | 19.38         | 19.49   | 19.82 | 0.124 |
|              | Inst. 05       | 1014.75         | Unknown         | 1014.75 | 1046.8      | 1050.6  | 1053.0 | 1.677 | 3.15% | 3.53%   | 3.77% | 0.17% | 19.37         | 19.45   | 19.81 | 0.108 |
|              | Inst. 06       | 1017.75         | Unknown         | 1017.75 | 1046.8      | 1050.2  | 1053.5 | 2.164 | 2.85% | 3.19%   | 3.51% | 0.21% | 19.33         | 19.46   | 19.70 | 0.106 |
|              | Inst. 07       | 1013.75         | Unknown         | 1013.75 | 1045.5      | 1048.4  | 1061.0 | 3.366 | 3.13% | 3.41%   | 4.66% | 0.33% | 19.35         | 19.39   | 19.45 | 0.024 |
|              | Inst. 08       | 1008.25         | Unknown         | 1008.25 | 1044.3      | 1049.6  | 1057.0 | 4.129 | 3.57% | 4.10%   | 4.84% | 0.41% | 19.32         | 19.40   | 19.43 | 0.024 |
|              | Inst. 09       | 1016.50         | Unknown         | 1016.50 | 1044.3      | 1048.9  | 1054.5 | 2.046 | 2.73% | 3.19%   | 3.74% | 0.20% | 19.38         | 19.43   | 19.47 | 0.024 |
|              | Inst. 10       | 1017.00         | Unknown         | 1017.00 | 1047.8      | 1053.0  | 1057.3 | 2.530 | 3.02% | 3.54%   | 3.96% | 0.25% | 19.36         | 19.41   | 19.45 | 0.025 |
|              | Crisp          | 1000            | Unknown         | 1000.00 | 1035.0      | 1039.8  | 1045.0 | 1.789 | 3.50% | 3.98%   | 4.50% | 0.18% | 19.42         | 19.46   | 19.51 | 0.022 |
| Average      |                |                 |                 | 1045.2  | 1050.0      | 1055.7  | 2.461  | 2.95% | 3.43% | 3.99%   | 0.24% | 19.37 | 19.47         | 19.65   | 0.073 |       |
| j8-per10-1   | Inst. 01       | 1011.75         | Unknown         | 1011.75 | 1020.3      | 1028.4  | 1035.0 | 4.382 | 0.84% | 1.65%   | 2.30% | 0.43% | 19.33         | 19.39   | 19.44 | 0.026 |
|              | Inst. 02       | 1007.75         | Unknown         | 1007.75 | 1024.8      | 1030.1  | 1035.3 | 3.389 | 1.69% | 2.22%   | 2.73% | 0.34% | 19.39         | 19.45   | 19.62 | 0.040 |
|              | Inst. 03       | 1007.50         | Unknown         | 1007.50 | 1022.8      | 1030.3  | 1036.3 | 3.607 | 1.51% | 2.27%   | 2.85% | 0.36% | 19.38         | 19.44   | 19.48 | 0.024 |
|              | Inst. 04       | 1004.25         | Unknown         | 1004.25 | 1024.3      | 1029.7  | 1037.3 | 3.045 | 1.99% | 2.53%   | 3.29% | 0.30% | 19.36         | 19.41   | 19.47 | 0.029 |
|              | Inst. 05       | 1004.25         | Unknown         | 1004.25 | 1022.3      | 1029.1  | 1034.8 | 3.640 | 1.79% | 2.48%   | 3.04% | 0.36% | 19.37         | 19.43   | 19.47 | 0.023 |
|              | Inst. 06       | 1004.00         | Unknown         | 1004.00 | 1020.5      | 1028.0  | 1035.0 | 4.481 | 1.64% | 2.39%   | 3.09% | 0.45% | 19.38         | 19.44   | 19.49 | 0.033 |
|              | Inst. 07       | 1006.75         | Unknown         | 1006.75 | 1013.8      | 1028.6  | 1034.3 | 5.450 | 0.70% | 2.17%   | 2.73% | 0.54% | 19.38         | 19.49   | 19.62 | 0.058 |
|              | Inst. 08       | 1003.25         | Unknown         | 1003.25 | 1028.0      | 1032.1  | 1039.0 | 2.774 | 2.47% | 2.88%   | 3.56% | 0.28% | 19.37         | 19.42   | 19.46 | 0.023 |
|              | Inst. 09       | 1008.75         | Unknown         | 1008.75 | 1022.5      | 1030.8  | 1035.3 | 3.312 | 1.36% | 2.18%   | 2.63% | 0.33% | 19.40         | 19.45   | 19.53 | 0.032 |
|              | Inst. 10       | 1001.00         | Unknown         | 1001.00 | 1022.5      | 1030.9  | 1036.3 | 3.154 | 2.15% | 2.99%   | 3.52% | 0.32% | 19.35         | 19.41   | 19.50 | 0.028 |
|              | Crisp          | 1000            | Unknown         | 1000.00 | 1011.0      | 1020.1  | 1027.0 | 3.854 | 1.10% | 2.01%   | 2.70% | 0.39% | 19.39         | 19.42   | 19.47 | 0.021 |
| Average      |                |                 |                 | 1022.2  | 1029.8      | 1035.8  | 3.723  | 1.61% | 2.38% | 2.97%   | 0.37% | 19.37 | 19.43         | 19.51   | 0.032 |       |

| 8x8 Problems |                |                 |                 |         |             |         |        |       |       |         |       |       |       |               |       |       |  |
|--------------|----------------|-----------------|-----------------|---------|-------------|---------|--------|-------|-------|---------|-------|-------|-------|---------------|-------|-------|--|
| Problem      | Fuzzy instance | Lower Bound     |                 |         | E[Makespan] |         |        |       |       | %RE     |       |       |       | Runtime (sec) |       |       |  |
|              |                | LB <sub>f</sub> | LB <sub>c</sub> | LB      | Best        | Average | Worst  | StDev | Best  | Average | Worst | StDev | Best  | Average       | Worst | StDev |  |
| j8-per10-2   | Inst. 01       | 1003.00         | Unknown         | 1003.00 | 1013.8      | 1031.3  | 1041.3 | 6.393 | 1.07% | 2.82%   | 3.81% | 0.64% | 19.39 | 19.46         | 19.57 | 0.056 |  |
|              | Inst. 02       | 1006.00         | Unknown         | 1006.00 | 1016.3      | 1030.6  | 1042.8 | 7.625 | 1.02% | 2.45%   | 3.65% | 0.76% | 19.39 | 19.48         | 19.60 | 0.062 |  |
|              | Inst. 03       | 1004.75         | Unknown         | 1004.75 | 1016.0      | 1031.1  | 1040.0 | 5.801 | 1.12% | 2.63%   | 3.51% | 0.58% | 19.37 | 19.47         | 19.55 | 0.055 |  |
|              | Inst. 04       | 1009.75         | Unknown         | 1009.75 | 1017.8      | 1034.6  | 1042.5 | 5.989 | 0.79% | 2.46%   | 3.24% | 0.59% | 19.36 | 19.42         | 19.47 | 0.029 |  |
|              | Inst. 05       | 1005.00         | Unknown         | 1005.00 | 1020.8      | 1033.2  | 1043.5 | 5.572 | 1.57% | 2.81%   | 3.83% | 0.55% | 19.37 | 19.43         | 19.48 | 0.024 |  |
|              | Inst. 06       | 1006.25         | Unknown         | 1006.25 | 1020.0      | 1030.7  | 1037.5 | 5.555 | 1.37% | 2.43%   | 3.11% | 0.55% | 19.37 | 19.44         | 19.50 | 0.027 |  |
|              | Inst. 07       | 1009.00         | Unknown         | 1009.00 | 1029.8      | 1034.6  | 1042.3 | 3.263 | 2.06% | 2.53%   | 3.30% | 0.32% | 19.40 | 19.45         | 19.48 | 0.022 |  |
|              | Inst. 08       | 1007.75         | Unknown         | 1007.75 | 1021.3      | 1034.7  | 1042.3 | 4.694 | 1.34% | 2.67%   | 3.42% | 0.47% | 19.40 | 19.51         | 19.63 | 0.067 |  |
|              | Inst. 09       | 1003.25         | Unknown         | 1003.25 | 1016.3      | 1032.9  | 1042.8 | 6.733 | 1.30% | 2.95%   | 3.94% | 0.67% | 19.37 | 19.44         | 19.49 | 0.025 |  |
|              | Inst. 10       | 1003.75         | Unknown         | 1003.75 | 1022.8      | 1031.5  | 1040.5 | 5.283 | 1.89% | 2.76%   | 3.66% | 0.53% | 19.35 | 19.43         | 19.70 | 0.057 |  |
|              | Crisp          | 1000            | Unknown         | 1000.00 | 1003.0      | 1024.2  | 1031.0 | 6.243 | 0.30% | 2.42%   | 3.10% | 0.62% | 19.54 | 19.61         | 19.65 | 0.026 |  |
| Average      |                |                 |                 | 1019.5  | 1032.5      | 1041.5  | 5.691  | 1.35% | 2.65% | 3.55%   | 0.57% | 19.38 | 19.45 | 19.55         | 0.043 |       |  |
| j8-per20-0   | Inst. 01       | 1003.75         | 1000            | 1003.75 | 1009.5      | 1013.6  | 1018.3 | 2.511 | 0.57% | 0.98%   | 1.44% | 0.25% | 19.55 | 19.59         | 19.71 | 0.031 |  |
|              | Inst. 02       | 1003.25         | 1000            | 1003.25 | 1007.3      | 1012.8  | 1019.8 | 2.974 | 0.40% | 0.95%   | 1.64% | 0.30% | 19.39 | 19.43         | 19.48 | 0.027 |  |
|              | Inst. 03       | 1007.25         | 1000            | 1007.25 | 1010.8      | 1016.3  | 1021.3 | 2.883 | 0.35% | 0.90%   | 1.39% | 0.29% | 19.36 | 19.40         | 19.44 | 0.023 |  |
|              | Inst. 04       | 1007.75         | 1000            | 1007.75 | 1012.3      | 1016.1  | 1024.0 | 2.460 | 0.45% | 0.83%   | 1.61% | 0.24% | 19.37 | 19.45         | 19.55 | 0.056 |  |
|              | Inst. 05       | 1004.75         | 1000            | 1004.75 | 1005.5      | 1013.8  | 1020.5 | 3.450 | 0.07% | 0.90%   | 1.57% | 0.34% | 19.35 | 19.41         | 19.44 | 0.025 |  |
|              | Inst. 06       | 1002.50         | 1000            | 1002.50 | 1011.3      | 1015.5  | 1020.8 | 2.359 | 0.87% | 1.30%   | 1.82% | 0.24% | 19.36 | 19.43         | 19.47 | 0.027 |  |
|              | Inst. 07       | 1009.25         | 1000            | 1009.25 | 1011.3      | 1015.6  | 1022.3 | 2.614 | 0.20% | 0.63%   | 1.29% | 0.26% | 19.34 | 19.45         | 19.54 | 0.065 |  |
|              | Inst. 08       | 1012.00         | 1000            | 1012.00 | 1018.3      | 1022.3  | 1029.0 | 2.895 | 0.62% | 1.02%   | 1.68% | 0.29% | 19.39 | 19.49         | 19.58 | 0.045 |  |
|              | Inst. 09       | 1008.50         | 1000            | 1008.50 | 1011.5      | 1016.1  | 1022.3 | 2.959 | 0.30% | 0.75%   | 1.36% | 0.29% | 19.37 | 19.42         | 19.46 | 0.025 |  |
|              | Inst. 10       | 1010.25         | 1000            | 1010.25 | 1011.3      | 1014.9  | 1019.5 | 2.112 | 0.10% | 0.46%   | 0.92% | 0.21% | 19.40 | 19.44         | 19.48 | 0.022 |  |
|              | Crisp          | 1000            | 1000            | 1000.00 | 1003.0      | 1007.5  | 1013.0 | 2.751 | 0.30% | 0.75%   | 1.30% | 0.28% | 19.40 | 19.45         | 19.51 | 0.027 |  |
| Average      |                |                 |                 | 1010.9  | 1015.7      | 1021.8  | 2.722  | 0.39% | 0.87% | 1.47%   | 0.27% | 19.39 | 19.45 | 19.52         | 0.035 |       |  |
| j8-per20-1   | Inst. 01       | 1000.75         | 1000            | 1000.75 | 1000.8      | 1002.7  | 1005.0 | 1.072 | 0.00% | 0.20%   | 0.42% | 0.11% | 19.41 | 19.56         | 19.61 | 0.041 |  |
|              | Inst. 02       | 1000.00         | 1000            | 1000.00 | 1000.0      | 1000.7  | 1002.3 | 0.787 | 0.00% | 0.07%   | 0.23% | 0.08% | 19.38 | 19.47         | 19.59 | 0.045 |  |
|              | Inst. 03       | 1002.25         | 1000            | 1002.25 | 1002.3      | 1003.3  | 1005.0 | 0.737 | 0.00% | 0.10%   | 0.27% | 0.07% | 19.34 | 19.42         | 19.49 | 0.030 |  |
|              | Inst. 04       | 1000.00         | 1000            | 1000.00 | 1000.0      | 1000.7  | 1003.5 | 0.808 | 0.00% | 0.07%   | 0.35% | 0.08% | 19.40 | 19.46         | 19.62 | 0.056 |  |
|              | Inst. 05       | 1000.00         | 1000            | 1000.00 | 1000.0      | 1001.1  | 1003.0 | 0.870 | 0.00% | 0.11%   | 0.30% | 0.09% | 19.38 | 19.45         | 19.54 | 0.030 |  |
|              | Inst. 06       | 1000.00         | 1000            | 1000.00 | 1000.0      | 1001.4  | 1005.0 | 1.367 | 0.00% | 0.14%   | 0.50% | 0.14% | 19.39 | 19.46         | 19.50 | 0.031 |  |
|              | Inst. 07       | 1000.00         | 1000            | 1000.00 | 1000.0      | 1000.4  | 1001.3 | 0.374 | 0.00% | 0.04%   | 0.13% | 0.04% | 19.38 | 19.46         | 19.66 | 0.066 |  |
|              | Inst. 08       | 1000.00         | 1000            | 1000.00 | 1000.0      | 1001.9  | 1005.5 | 1.560 | 0.00% | 0.19%   | 0.55% | 0.16% | 19.35 | 19.40         | 19.44 | 0.023 |  |
|              | Inst. 09       | 1000.00         | 1000            | 1000.00 | 1000.0      | 1000.8  | 1004.3 | 0.910 | 0.00% | 0.08%   | 0.43% | 0.09% | 19.37 | 19.43         | 19.63 | 0.050 |  |
|              | Inst. 10       | 1000.00         | 1000            | 1000.00 | 1000.0      | 1001.1  | 1003.3 | 1.170 | 0.00% | 0.11%   | 0.33% | 0.12% | 19.42 | 19.46         | 19.51 | 0.022 |  |
|              | Crisp          | 1000            | 1000            | 1000.00 | 1000.0      | 1000.0  | 1000.0 | 0.000 | 0.00% | 0.00%   | 0.00% | 0.00% | 19.38 | 19.47         | 19.58 | 0.061 |  |
| Average      |                |                 |                 | 1000.3  | 1001.4      | 1003.8  | 0.965  | 0.00% | 0.11% | 0.35%   | 0.10% | 19.38 | 19.46 | 19.56         | 0.039 |       |  |
| j8-per20-2   | Inst. 01       | 1003.50         | 1000            | 1003.50 | 1006.0      | 1013.5  | 1017.3 | 3.008 | 0.25% | 0.99%   | 1.37% | 0.30% | 19.41 | 19.47         | 19.58 | 0.040 |  |
|              | Inst. 02       | 1001.00         | 1000            | 1001.00 | 1005.0      | 1010.7  | 1015.3 | 2.206 | 0.40% | 0.97%   | 1.42% | 0.22% | 19.38 | 19.46         | 19.64 | 0.063 |  |
|              | Inst. 03       | 1008.75         | 1000            | 1008.75 | 1009.8      | 1013.3  | 1020.0 | 3.167 | 0.10% | 0.45%   | 1.12% | 0.31% | 19.38 | 19.43         | 19.56 | 0.041 |  |
|              | Inst. 04       | 1006.75         | 1000            | 1006.75 | 1011.5      | 1015.7  | 1021.0 | 2.920 | 0.47% | 0.89%   | 1.42% | 0.29% | 19.40 | 19.45         | 19.49 | 0.020 |  |
|              | Inst. 05       | 1004.50         | 1000            | 1004.50 | 1009.0      | 1013.7  | 1019.0 | 2.462 | 0.45% | 0.91%   | 1.44% | 0.25% | 19.43 | 19.46         | 19.51 | 0.021 |  |
|              | Inst. 06       | 1002.00         | 1000            | 1002.00 | 1006.5      | 1010.7  | 1016.0 | 2.701 | 0.45% | 0.87%   | 1.40% | 0.27% | 19.39 | 19.42         | 19.47 | 0.022 |  |
|              | Inst. 07       | 1005.25         | 1000            | 1005.25 | 1008.0      | 1013.2  | 1022.8 | 3.174 | 0.27% | 0.79%   | 1.74% | 0.32% | 19.35 | 19.41         | 19.44 | 0.024 |  |
|              | Inst. 08       | 1013.75         | 1000            | 1013.75 | 1017.3      | 1021.9  | 1027.3 | 3.411 | 0.35% | 0.81%   | 1.33% | 0.34% | 19.44 | 19.52         | 19.60 | 0.038 |  |
|              | Inst. 09       | 1006.75         | 1000            | 1006.75 | 1007.5      | 1013.4  | 1019.3 | 2.279 | 0.07% | 0.66%   | 1.24% | 0.23% | 19.43 | 19.51         | 19.59 | 0.039 |  |
|              | Inst. 10       | 1009.00         | 1000            | 1009.00 | 1009.8      | 1013.9  | 1018.0 | 2.460 | 0.07% | 0.48%   | 0.89% | 0.24% | 19.39 | 19.51         | 19.66 | 0.047 |  |
|              | Crisp          | 1000            | 1000            | 1000.00 | 1000.0      | 1004.5  | 1009.0 | 2.177 | 0.00% | 0.45%   | 0.90% | 0.22% | 19.40 | 19.47         | 19.52 | 0.029 |  |
| Average      |                |                 |                 | 1009.0  | 1014.0      | 1019.6  | 2.779  | 0.29% | 0.78% | 1.34%   | 0.28% | 19.40 | 19.46 | 19.55         | 0.036 |       |  |
